# Supplementary material for: Non-Targeted Metabolomics Analysis Revealed the Characteristic Non-Volatile and Volatile Metabolites in the Rougui Wuyi Rock Tea (Camellia sinensis) from Different Culturing Regions
Source: Foods. 2022 Jun 9;11(12):1694. doi: 10.3390/foods11121694 (PMC9222269; doi:10.3390/foods11121694)
Supplement: Supplementary file 1 [file foods-11-01694-s001.zip › Table S1.xlsx]

## Sheet: Sheet2
ID	name	mz	rt	exact_mass	ppm	formula	KEGG	type	library	identify.pvalue	P210101813	P210101814	P210101815	P210101816	P210101817	P210101818	P210101819	P210101820	P210101821
M135T594	(-)-3-Isothujone	135.117	594.367	152.12	29.2576	C10H16O	C09906	[M+H-H2O]+	BioDeepDB	0.000121347	2.32551e+07	7.30632e+06	4.39159e+06	3.5314e+07	3.57807e+07	3.34102e+07	4.457e+06	1.23042e+07	3.67067e+07
M387T665	(-)-5-Demethylyatein	387.142	664.841	386.137	2.30185	C21H22O7	C21184	[M+H]+	BioDeepDB	0.0394683	1.47559e+07	7.15817e+06	9.01736e+06	1.73206e+07	1.5878e+07	1.37724e+07	1.28213e+07	1.11617e+07	1.24302e+07
M153T611	(-)-cis-Carveol	153.127	610.558	152.12	2.40328	C10H16O	C11395	[M+H]+	BioDeepDB	5.00897e-06	3.71633e+06	2.72122e+06	1.22928e+07	7.22691e+06	2.92774e+07	3.58057e+07	9.02652e+06	8.63058e+06	1.72737e+07
M305T409	(-)-Epigallocatechin	305.208	408.551	306.074	1.95795	C15H14O7	C12136	[M-H]-	BioDeepDB	2.20971e-30	2.52155e+07	1.99875e+07	3.49132e+07	6.04945e+07	6.39042e+07	4.62627e+07	3.98844e+07	3.25887e+07	5.01782e+07
M151T639	(-)-Isopiperitenone	151.111	639.1	150.105	4.67951	C10H14O	C02485	[M+H]+	BioDeepDB	2.29702e-05	1.76387e+07	1.64711e+07	2.62247e+07	2.30323e+07	4.24254e+07	1.5711e+07	3.9395e+07	3.12319e+07	4.01325e+07
M359T703	(-)-Matairesinol	359.147	703.236	358.142	4.13179	C20H22O6	C10682	[M+H]+	BioDeepDB	0.0971742	1.53357e+07	9.59947e+06	1.731e+07	2.08342e+07	1.739e+07	1.41283e+07	2.22886e+07	1.82001e+07	2.56742e+07
M151T545	(+)-(S)-Carvone	151.111	545.099	150.105	1.53349	C10H14O	C11383	[M+H]+	BioDeepDB	0.000283456	3.64425e+07	2.49336e+07	4.22256e+07	3.57058e+07	2.66494e+07	2.73442e+07	4.08009e+07	4.01597e+07	4.53304e+07
M211T685	(+)-7-Isojasmonic acid	211.133	684.893	210.126	0.00362929	C12H18O3	C16317	[M+H]+	BioDeepDB	7.87927e-07	1.64847e+07	1.19652e+07	2.05693e+07	1.00538e+07	1.00278e+07	9.73595e+06	6.94191e+06	6.548e+06	7.61455e+06
M305T797	(+)-Gallocatechin	305.068	797.384	306.074	4.83092	C15H14O7	C12127	[M-H]-	MoNA	3.51739e-11	2.17525e+06	1.60538e+06	2.32857e+06	4.8446e+06	1.62702e+07	8.63778e+06	2.21384e+07	1.27028e+07	8.72115e+06
M291T418	(+/-)-5-[(tert-Butylamino)-2-hydroxypropoxy]-3,4-dihydro-1(2H)-naphthalenone	291.18	417.807	291.183	4.28132	C17H25NO3	C04883	[M]+	BioDeepDB	0.0517132	7.76033e+06	6.66375e+06	7.18186e+06	3.54302e+07	2.99793e+07	2.27337e+07	1.4389e+07	9.81842e+06	1.52963e+07
M353T658	(13E)-11a-Hydroxy-9,15-dioxoprost-13-enoic acid	353.229	657.651	352.225	0.639442	C20H32O5	C04654	[M+H]+	BioDeepDB	2.31516e-07	1.01578e+07	1.04462e+07	7.19606e+06	8.34341e+06	7.25504e+06	6.83275e+06	1.02561e+07	8.90425e+06	7.92851e+06
M160T105	(1H-Indol-3-yl)-N-methylmethanamine	160.107	104.686	160.1	8.16713	C10H12N2	C21602	[M]+	BioDeepDB	5.40909e-06	6.57241e+07	5.91081e+07	6.31272e+07	9.48845e+07	9.16033e+07	8.59313e+07	7.5161e+07	6.15568e+07	7.35578e+07
M179T721	(1S,2R,4S)-(-)-Bornyl acetate	179.143	721.087	196.146	22.0265	C12H20O2	C09837	[M+H-H2O]+	BioDeepDB	1.78371e-05	3.15814e+07	2.27647e+07	4.72377e+07	3.2697e+07	3.09094e+07	2.94956e+07	2.00771e+07	1.88416e+07	1.84839e+07
M169T545	(1S,4R)-1-Hydroxy-2-oxolimonene	169.122	545.099	168.115	0.587089	C10H16O2	C11937	[M+H]+	BioDeepDB	7.31623e-11	2.33462e+07	1.48619e+07	2.54405e+07	2.21247e+07	1.67862e+07	1.7073e+07	2.32784e+07	2.07476e+07	2.37678e+07
M130T322_1	(2E)-Decenoyl-ACP	130.086	321.665	129.079	3.74219	C6H11NO2	C03969	[M+H]+	BioDeepDB	0.00263113	7.10852e+08	4.14683e+08	7.54305e+08	7.02734e+08	7.17194e+08	5.20782e+08	1.64539e+09	1.28969e+09	1.43144e+09
M146T280	(2R,5S)-2,5-Diaminohexanoate	146.117	279.551	146.106	0.901348	C6H14N2O2	C05161	[M]+	BioDeepDB	0.150405	2.56903e+07	1.56146e+07	3.24652e+07	2.09449e+07	2.10765e+07	1.84997e+07	3.03108e+07	1.864e+07	3.75488e+07
M156T357	(3S,5S)-Carbapenam-3-carboxylic acid	156.066	357.164	155.058	0.241179	C7H9NO3	C17367	[M+H]+	BioDeepDB	0.200409	6.69841e+07	4.97838e+07	6.4021e+07	1.30595e+08	1.22894e+08	9.6192e+07	1.05648e+08	8.58419e+07	9.83773e+07
M259T156	(5-L-Glutamyl)-L-glutamate	259.092	155.554	276.096	13.0203	C10H16N2O7	C05282	[M+H-H2O]+	mzCloud	2.86266e-06	2.68688e+07	5.87056e+07	1.39537e+08	3.74239e+07	3.6949e+07	7.36514e+06	8.94378e+07	6.41506e+07	1.98674e+07
M147T575	(E)-3-(4-Hydroxyphenyl)-2-propenal	147.044	574.995	148.052	7.10864	C9H8O2	C05608	[M-H]-	BioDeepDB	4.67035e-06	1.24124e+07	9.19244e+06	1.41659e+07	5.52398e+06	6.88041e+06	6.29067e+06	7.14114e+06	6.76449e+06	9.20074e+06
M285T607	(R,S)-Coclaurine	285.169	606.993	285.137	25.492	C17H19NO3	C06348	[M]+	BioDeepDB	3.42882e-06	1.95636e+07	1.17939e+07	1.49954e+07	2.19035e+07	2.50563e+07	2.50386e+07	1.58864e+07	2.14673e+07	1.57635e+07
M283T77	(R)-10-Hydroxystearate	283.264	76.9009	300.266	16.4366	C18H36O3	C03195	[M+H-H2O]+	MetaDNA	0.0122044	3.32526e+07	7.76808e+06	2.41051e+07	2.32967e+07	2.42612e+07	2.79772e+07	5.74081e+06	2.19534e+07	1.92025e+07
M151T407	(R)-4-Hydroxymandelate	151.039	406.517	168.042	24.5038	C8H8O4	C05343	[M+H-H2O]+	BioDeepDB	0.000283086	7.43044e+07	5.91048e+07	6.70612e+07	9.55977e+07	8.84108e+07	8.33251e+07	6.82544e+07	5.85882e+07	7.77005e+07
M128T334	(R)-5,6-Dihydrothymine	128.071	333.749	128.059	0.022998	C5H8N2O2	C21028	[M]+	BioDeepDB	2.07472e-05	1.08346e+08	6.73208e+07	9.32805e+07	8.07044e+07	8.92504e+07	6.78774e+07	1.12518e+08	9.43497e+07	2.6585e+07
M123T36	(S)-1-Phenylethanol	123.04	36.1478	122.073	2.87917	C8H10O	C11348	[M+H]+	BioDeepDB	1.19951e-07	1.38678e+08	1.07827e+08	1.92162e+08	9.87776e+07	1.1962e+08	1.77713e+08	1.1771e+08	1.76015e+08	1.06563e+08
M114T182	(S)-1-Pyrroline-5-carboxylate	114.055	182.353	113.048	0.667188	C5H7NO2	C03912	[M+H]+	BioDeepDB	1.79734e-06	8.87109e+06	2.71484e+07	3.67679e+07	3.33799e+07	1.74211e+07	1.62703e+07	2.1161e+07	2.83062e+07	2.13167e+07
M146T314	(S)-2-amino-6-oxohexanoate	146.08	313.556	145.074	7.38999	C6H11NO3	C04076	[M+H]+	MetaDNA	0.00796441	2.46757e+08	1.57994e+08	2.32775e+08	1.35689e+08	1.06904e+08	9.67154e+07	1.63431e+08	1.32707e+08	1.67741e+08
M128T314	(S)-2,3,4,5-tetrahydropyridine-2-carboxylate	128.071	313.511	127.063	0.0196413	C6H9NO2	C00450	[M+H]+	BioDeepDB	1.99865e-06	5.16086e+08	2.95132e+08	4.98802e+08	2.32175e+08	2.3694e+08	2.12643e+08	3.62026e+08	3.42764e+08	5.66164e+08
M265T635	(S)-Abscisic acid	265.143	635.055	264.136	2.80754	C15H20O4	C06082	[M+H]+	BioDeepDB	3.06901e-08	2.07095e+07	1.47131e+07	1.77842e+07	1.81441e+07	1.38222e+07	1.31204e+07	1.89951e+07	1.45438e+07	1.89776e+07
M102T707	(S)-Methylmalonic acid semialdehyde	102.034	707.399	102.032	8.90188	C4H6O3	C06002	[M]+	BioDeepDB	8.18697e-12	5.22482e+08	7.52508e+08	2.03031e+08	3.56293e+08	8.25048e+07	2.679e+08	1.94385e+08	3.34184e+08	7.66079e+07
M275T788	[8]-Shogaol	275.168	788.333	276.173	10.925	C17H24O3	C10494	[M-H]-	BioDeepDB	0.000451694	1.8077e+07	4.21854e+06	1.29225e+07	3.63867e+06	1.30472e+07	4.05758e+06	1.21254e+07	8.35928e+06	1.27003e+07
M276T354	1-(3,4-Dihydroxyphenyl)-1-decene-3,5-dione	276.143	354.244	276.136	25.7002	C16H20O4	C17745	[M]+	MetaDNA	0.0506022	1.94162e+07	1.48326e+07	2.15084e+07	2.01118e+07	1.45581e+07	1.30224e+07	2.49794e+07	2.35569e+07	2.54503e+07
M261T358	1-(4-Hydroxyphenyl)-1-decene-3,5-dione	261.144	357.65	260.141	4.06438	C16H20O3	C17744	[M+H]+	BioDeepDB	5.91585e-06	3.35839e+07	4.96706e+07	6.01229e+07	1.01434e+08	8.18785e+07	7.44575e+07	9.22627e+07	8.83191e+07	6.62723e+07
M290T647	1-Dehydro-[6]-gingerdione	290.159	646.842	290.152	25.0304	C17H22O4	C17746	[M]+	BioDeepDB	0.00401945	1.74509e+07	1.38465e+07	2.13963e+07	1.74638e+07	1.227e+07	1.10484e+07	2.20977e+07	1.93812e+07	2.41584e+07
M243T379	1-Hexadecanol	243.182	379.395	242.261	1.81883	C16H34O	C00823	[M+H]+	BioDeepDB	0.000800003	1.18624e+08	1.32442e+08	8.97046e+07	9.17563e+07	8.76003e+07	1.14212e+08	8.04374e+07	7.72089e+07	7.25198e+07
M403T553	1-Hydroxy-2-(beta-D-glucosyloxy)-9,10-anthraquinone	403.1	552.512	402.095	5.57775	C20H18O9	C04719	[M+H]+	BioDeepDB	0.114959	2.00282e+07	2.09543e+07	2.07987e+07	3.96345e+07	2.78071e+07	2.58623e+07	2.82849e+07	1.97597e+07	2.97774e+07
M281T31_2	1-Methyladenosine	281.245	31.2122	281.112	6.86084	C11H15N5O4	C02494	[M]+	BioDeepDB	0.00159066	0	1.1822e+07	0	0	0	9.46343e+06	9.27114e+06	8.65478e+06	8.49771e+06
M137T90	1-Methylnicotinamide	137.071	89.5121	137.071	0.73195	C7H9N2O	C02918	[M+H]+	BioDeepDB	2.19595e-40	3.36669e+07	2.60363e+07	4.76049e+07	2.35319e+07	1.79078e+07	1.76989e+07	1.99483e+07	1.55216e+07	2.56364e+07
M167T330	1-Methylxanthine	167.055	329.637	166.049	6.23427	C6H6N4O2	C16358	[M+H]+	BioDeepDB	0.00056681	2.22722e+07	1.85528e+07	2.64801e+07	3.53172e+07	2.54273e+07	2.32237e+07	2.08561e+07	1.45399e+07	2.15129e+07
M463T307_2	1-O-(2-Acetamido-2-deoxy-alpha-D-glucopyranosyl)-1D-myo-inositol 3-phosphate	463.088	306.789	463.109	0.880135	C14H26NO14P	C19761	[M]+	BioDeepDB	2.71662e-10	1.30736e+07	1.19433e+07	4.68502e+06	5.58705e+07	4.04753e+07	3.38614e+07	2.97273e+07	3.08296e+07	3.96961e+07
M355T312	1-O-Feruloyl-beta-D-glucose	355.102	311.83	356.111	3.71449	C16H20O9	C17759	[M-H]-	MetaDNA	0.0154029	1.08409e+07	9.10696e+06	1.30205e+07	1.50696e+07	1.36604e+07	1.29117e+07	1.62893e+07	1.5337e+07	1.591e+07
M331T91	1-O-Galloyl-beta-D-glucose	331.066	91.4921	332.074	2.81921	C13H16O10	C01158	[M-H]-	MetaDNA	0.00242625	3.32365e+07	2.88669e+07	3.76006e+07	7.06829e+07	6.31607e+07	6.61154e+07	4.0846e+07	3.97122e+07	4.45462e+07
M467T455_1	1-O,6-O-Digalloyl-beta-D-glucose	467.078	454.726	484.085	0.40307	C20H20O14	C04101	[M+H-H2O]+	BioDeepDB	2.08372e-08	2.69553e+07	1.80346e+07	2.24043e+07	3.18956e+07	3.39285e+07	3.0717e+07	3.38474e+07	3.39388e+07	3.20959e+07
M389T839	1-palmitoyl-dihydroxyacetone-phosphate	389.208	839.067	408.228	2.28795	C19H37O7P	C01192	[M-H2O-H]-	MetaDNA	0.00046898	9.5769e+06	9.53139e+06	1.94021e+07	4.71806e+06	5.12065e+06	4.04584e+06	6.49974e+06	6.36718e+06	8.02725e+06
M129T125	1,1-Dimethylbiguanide	129.102	124.788	129.101	1.46481	C4H11N5	C07151	[M]+	BioDeepDB	0.00143691	2.01221e+07	8.54648e+06	2.54641e+07	3.38401e+07	9.40199e+06	2.58344e+07	4.28062e+07	3.21934e+07	4.18355e+07
M127T357	1,2,3-Trihydroxybenzene	127.039	356.962	126.032	2.69543	C6H6O3	C01108	[M+H]+	BioDeepDB	5.22851e-09	3.47235e+08	2.72014e+08	4.12899e+08	1.60649e+08	1.46843e+08	3.63386e+08	1.23256e+08	1.04711e+08	1.42755e+08
M211T403_1	1,3,7-Trimethyluric acid	211.082	402.688	210.075	3.00218	C8H10N4O3	C16361	[M+H]+	MoNA	4.99181e-06	2.98926e+07	2.45029e+07	2.4661e+07	1.17778e+07	1.28588e+07	1.6104e+07	1.0323e+07	9.76737e+06	7.86052e+06
M515T455	1,5-Dicaffeoylquinic acid	515.117	455.469	516.127	4.3889	C25H24O12	C10445	[M-H]-	BioDeepDB	3.01695e-10	8.71432e+06	6.73808e+06	7.67673e+06	2.11277e+07	1.7946e+07	1.53838e+07	1.27522e+07	1.01129e+07	1.38863e+07
M171T796	10-Hydroxydecanoic acid	171.138	795.894	188.141	23.2833	C10H20O3	C02774	[M+H-H2O]+	BioDeepDB	3.20627e-07	4.1763e+07	2.09157e+07	5.0443e+07	3.32905e+07	3.23395e+07	2.61565e+07	3.09852e+07	2.92663e+07	3.75155e+07
M350T272	10-Hydroxydihydrosanguinarine	350.107	272.313	349.095	13.0282	C20H15NO5	C05247	[M+H]+	MetaDNA	0.0119868	8.88167e+06	3.97142e+06	4.57462e+06	2.09179e+07	1.70554e+07	7.86959e+06	8.33593e+06	7.13167e+06	7.71584e+06
M303T834	11b-Hydroxyandrost-4-ene-3,17-dione	303.195	834.418	302.188	0.150856	C19H26O3	C05284	[M+H]+	BioDeepDB	9.70139e-06	2.22308e+07	1.87557e+07	1.97335e+07	1.60814e+07	1.35603e+07	1.0019e+07	1.58663e+07	1.4231e+07	1.50328e+07
M215T789	12-Hydroxydodecanoic acid	215.01	789.201	216.173	4.89146	C12H24O3	C08317	[M-H]-	BioDeepDB	3.81383e-13	2.89496e+07	6.01345e+06	1.14746e+07	2.63495e+06	6.46647e+06	2.6342e+06	7.52282e+06	8.46945e+06	2.68492e+06
M293T765	12-OPDA	293.206	765.279	292.204	16.0162	C18H28O3	C01226	[M+H]+	BioDeepDB	0.00177199	3.67318e+07	2.24799e+07	3.04007e+07	2.07647e+07	777400	2.16238e+07	2.44501e+07	2.90418e+07	3.0032e+07
M297T793	12,13-DHOME	297.238	792.923	314.246	2.49441	C18H34O4	C14829	[M+H-H2O]+	mzCloud	1.88537e-05	5.19438e+07	3.91548e+07	4.2641e+07	3.90473e+07	3.7703e+07	7.2425e+07	8.05649e+07	4.70632e+07	4.5455e+07
M499T688	13-Deoxycarminomycin	499.194	688.032	499.184	19.2373	C26H29NO9	C12428	[M]+	MetaDNA	0.0175259	5.82184e+06	3.11934e+06	8.69019e+06	4.03467e+06	3.06667e+06	2.51682e+06	8.3763e+06	7.22353e+06	1.11961e+07
M313T773	13-L-Hydroperoxylinoleic acid	313.237	773.228	312.23	2.67985	C18H32O4	C04717	[M+H]+	BioDeepDB	2.85107e-09	2.37009e+07	2.09306e+07	2.54893e+07	2.29315e+07	2.56065e+07	4.02578e+07	3.50912e+07	1.77688e+07	1.83704e+07
M293T799	13(S)-HpOTrE	293.211	798.53	310.214	12.6279	C18H30O4	C04785	[M+H-H2O]+	BioDeepDB	7.01859e-07	7.28053e+06	5.36179e+06	1.24051e+07	4.99469e+06	1.35336e+07	1.71817e+07	6.67874e+07	2.67433e+07	2.72706e+07
M295T839_2	13S-hydroxyoctadecadienoic acid	295.227	839.061	296.235	1.43998	C18H32O3	C14762	[M-H]-	BioDeepDB	5.28935e-11	1.44099e+07	1.31617e+07	1.76715e+07	1.70961e+07	1.77793e+07	1.62869e+07	2.67008e+07	2.67703e+07	2.77812e+07
M174T540	1H-Indole-3-acetamide	174.055	540.466	174.079	0.389514	C10H10N2O	C02693	[M]-	BioDeepDB	0.0416284	2.20356e+07	1.30675e+07	2.15202e+07	9.52804e+06	1.005e+07	9.73179e+06	1.50919e+07	1.25918e+07	1.5867e+07
M134T414	2-(Methylamino)benzoic acid	134.059	414.112	151.063	25.1074	C8H9NO2	C03005	[M+H-H2O]+	BioDeepDB	1.16947e-05	3.9976e+07	3.37679e+07	4.52328e+07	4.94333e+07	4.20328e+07	3.6474e+07	3.65546e+07	3.4547e+07	3.67594e+07
M226T173	2-Amino-2-deoxyisochorismate	226.069	173.003	225.064	1.53238	C10H11NO5	C18054	[M+H]+	BioDeepDB	0.0670558	2.45143e+07	2.24997e+07	2.64869e+07	2.11674e+07	1.96592e+07	1.39451e+07	2.27818e+07	2.53055e+07	2.15159e+07
M137T162	2-Aminobenzoic acid	137.046	162.31	137.048	15.2784	C7H7NO2	C00108	[M]+	BioDeepDB	1.30292e-09	1.33088e+07	1.07978e+07	1.61471e+07	1.53282e+07	1.28339e+07	1.35017e+07	6.26671e+06	5.32579e+06	6.92286e+06
M110T102	2-Aminophenol	110.06	102.447	109.053	0.405774	C6H7NO	C01987	[M+H]+	mzCloud	1.1478e-05	2.92905e+08	1.93705e+08	3.02328e+08	9.89855e+07	9.59247e+07	7.42652e+07	7.57149e+07	6.21472e+07	9.04866e+07
M176T446	2-Hydroxy-3-oxoadipate	176.031	445.932	176.032	4.98395	C6H8O6	C03217	[M]+	BioDeepDB	0.252738	5.25031e+07	3.60182e+07	4.63546e+07	1.09179e+07	1.33519e+07	1.03857e+07	1.28666e+07	8.86436e+06	1.59207e+07
M348T705	2-Hydroxy-6-pentadecylbenzoic acid	348.273	704.897	348.266	19.8874	C22H36O3	C10759	[M]+	BioDeepDB	0.000221468	1.33599e+07	1.01742e+07	1.60772e+07	9.57429e+06	1.05813e+07	1.02463e+07	7.22767e+06	7.3559e+06	8.79864e+06
M96T102	2-Hydroxypyridine	96.0445	101.671	95.0371	1.64702	C5H5NO	C02502	[M+H]+	BioDeepDB	6.69061e-05	2.81262e+08	1.70978e+08	2.68145e+08	7.68599e+07	8.16056e+07	6.55319e+07	5.70602e+07	3.8104e+07	6.74465e+07
M175T99_2	2-Isopropylmalic acid	175.06	99.3227	176.069	5.51155	C7H12O5	C02504	[M-H]-	BioDeepDB	1.70815e-09	7.16788e+08	7.33096e+08	6.89411e+08	7.728e+08	6.98073e+08	7.67402e+08	6.52108e+08	6.79479e+08	6.82972e+08
M188T212	2-Keto-6-acetamidocaproate	188.091	211.708	187.084	2.03903	C8H13NO4	C05548	[M+H]+	BioDeepDB	0.000718653	7.32854e+07	4.98442e+07	4.538e+07	5.62129e+07	4.05482e+07	2.29672e+07	4.4981e+07	3.84438e+07	4.60211e+07
M145T48	2-Keto-glutaramic acid	145.049	47.6074	145.037	4.62337	C5H7NO4	C00940	[M]+	BioDeepDB	0.000128414	1.03039e+09	6.67687e+08	4.46833e+08	9.16078e+07	7.27098e+07	2.92179e+08	6.27614e+07	1.27305e+08	7.90582e+07
M101T95	2-Ketobutyric acid	101.023	94.7995	102.032	9.73789	C4H6O3	C00109	[M-H]-	BioDeepDB	1.18505e-06	7.79506e+07	5.6384e+07	6.97375e+07	7.42678e+07	1.51418e+07	1.27714e+07	6.07658e+07	1.06952e+08	1.32988e+08
M137T552	2-Methylbenzoic acid	137.059	552.404	136.052	1.6987	C8H8O2	C07215	[M+H]+	BioDeepDB	9.4339e-05	1.77106e+07	1.50685e+07	1.9679e+07	2.94691e+07	2.5751e+07	2.32863e+07	4.18639e+07	1.83669e+07	2.1859e+07
M119T423	2-Methylserine	119.049	422.89	119.058	1.88701	C4H9NO3	C02115	[M]+	BioDeepDB	0.129062	4.09949e+07	3.27168e+07	3.50735e+07	4.81696e+07	4.11167e+07	4.37139e+07	3.46123e+07	3.30201e+07	3.66046e+07
M179T593	2-Oxo-4-phenylbutyric acid	179.07	593.345	178.063	0.856461	C10H10O3	C20327	[M+H]+	BioDeepDB	0.000271362	9.85235e+07	6.49507e+07	8.63819e+07	4.94297e+07	5.43662e+07	4.66878e+07	3.77261e+07	3.38763e+07	4.45015e+07
M136T483	2-Phenylacetamide	136.075	482.894	135.068	1.97216	C8H9NO	C02505	[M+H]+	MoNA	2.11267e-06	5.64794e+07	3.41849e+07	5.30209e+07	2.50818e+07	2.55422e+07	2.42366e+07	2.07799e+07	5.01462e+06	3.64419e+07
M203T812	2-trans,6-trans-Farnesal	203.179	812.083	220.183	17.702	C15H24O	C03461	[M+H-H2O]+	BioDeepDB	8.82532e-08	1.29293e+07	8.19963e+06	3.698e+06	2.75314e+06	1.11277e+07	2.61503e+06	8.47713e+06	8.97793e+06	8.57681e+06
M154T155	2,3-Butanediol	154.049	155.021	154.012	13.0126	C4H10O2S2	C00265	[M]+	BioDeepDB	0.000167425	1.95687e+07	3.95979e+07	4.51952e+07	3.04728e+07	1.37668e+07	1.235e+07	1.5685e+07	1.28297e+07	1.77646e+07
M311T786	2,3-Dinor-8-iso prostaglandin F1alpha	311.221	786.496	328.225	11.4791	C18H32O5	C14795	[M+H-H2O]+	MetaDNA	0.0348496	3.02447e+07	2.072e+07	1.8478e+07	1.68932e+07	2.21615e+07	1.16989e+07	1.00093e+07	1.38131e+07	1.35271e+07
M309T809	2,3-Dinor-8-iso prostaglandin F2alpha	309.206	808.655	326.209	0.0336578	C18H30O5	C14794	[M+H-H2O]+	BioDeepDB	4.05323e-05	8.56147e+07	5.96454e+07	7.33939e+07	1.18667e+07	1.32158e+07	1.24154e+07	3.77059e+07	3.57001e+07	5.17804e+07
M433T443	2,3,4,4,6-Peptahydroxychalcone 4-O-glucoside	433.111	443.454	450.116	4.96806	C21H22O11	C16408	[M+H-H2O]+	BioDeepDB	8.34659e-05	5.29209e+07	1.37428e+07	6.10342e+07	7.22607e+07	4.0119e+07	1.10017e+07	6.65209e+07	4.26115e+07	7.46958e+07
M153T452	2,4-Dihydroxyacetophenone	153.102	452.409	152.047	8.16019	C8H8O3	C03663	[M+H]+	BioDeepDB	0.0308527	2.87113e+07	1.89258e+07	4.05652e+07	8.96436e+06	1.03914e+07	8.87117e+06	1.96264e+07	1.36938e+07	2.60092e+07
M230T540	2,4,6-Trihydroxybenzophenone	230.057	539.806	230.058	4.81732	C13H10O4	C06356	[M]+	MetaDNA	0.0177386	5.96155e+07	5.53459e+07	5.14243e+07	4.67858e+07	4.40235e+07	5.06062e+07	2.85252e+07	2.87262e+07	3.32083e+07
M150T430	2,6-Diethylaniline	150.127	430.372	149.12	1.78061	C10H15N	C11001	[M+H]+	mzCloud	0.000204714	2.84018e+07	1.65246e+07	3.60464e+07	1.06627e+07	9.81645e+06	8.7176e+06	1.25683e+07	1.00745e+07	1.32625e+07
M147T730	3-(2-Hydroxyphenyl)propanoic acid	146.965	729.51	166.063	0.0359942	C9H10O3	C01198	[M-H2O-H]-	BioDeepDB	2.13216e-10	1.85509e+07	5.72057e+06	1.50368e+07	2.77038e+06	3.37287e+06	1.10486e+07	2.2256e+07	2.17888e+07	1.9834e+07
M223T360	3-Benzylmalic acid	223.061	360.234	224.069	2.56046	C11H12O5	C20654	[M-H]-	MetaDNA	0.00609725	1.51479e+07	1.09299e+07	1.58114e+07	1.52122e+07	1.86311e+07	1.32137e+07	9.96803e+06	1.00317e+07	1.21671e+07
M173T117	3-Dehydroshikimate	172.977	116.888	172.037	2.65873	C7H8O5	C02637	[M+H]+	BioDeepDB	0.00171927	3.03218e+07	4.76958e+07	1.4905e+07	1.88958e+07	2.94972e+07	2.92591e+07	1.27086e+07	2.07229e+07	1.9041e+07
M152T334	3-Hydroxyanthranilic acid	152.035	333.597	153.043	2.08146	C7H7NO3	C00632	[M-H]-	BioDeepDB	5.62717e-06	1.71988e+07	1.21995e+07	2.33227e+07	9.37363e+06	1.1065e+07	9.30415e+06	1.1249e+07	1.06846e+07	1.52519e+07
M137T135	3-Hydroxybenzoic acid	137.023	134.861	138.032	0.282795	C7H6O3	C00587	[M-H]-	BioDeepDB	7.15669e-22	1.52934e+08	8.30476e+07	1.61141e+08	9.14713e+07	8.43581e+07	8.00874e+07	1.07251e+08	8.83193e+07	1.24819e+08
M151T415	3-Hydroxyphenylacetate	151.039	415.362	152.047	7.41782	C8H8O3	C05593	[M-H]-	mzCloud	2.0367e-05	4.02685e+07	2.40307e+07	3.06534e+07	2.04906e+07	2.20308e+07	2.04949e+07	2.40041e+07	2.13222e+07	2.96482e+07
M140T167	3-Hydroxypicolinic acid	140.033	166.764	139.027	4.60481	C6H5NO3	C18620	[M+H]+	BioDeepDB	0.000355221	8.13095e+07	5.42093e+07	8.46265e+07	2.85473e+07	3.30965e+07	2.8326e+07	2.75064e+07	2.40818e+07	3.20125e+07
M156T150	3-Indoleacetonitrile	156.066	150.395	156.069	19.0726	C10H8N2	C02938	[M]-	BioDeepDB	0.0346557	1.27452e+07	1.04904e+07	1.83227e+06	7.09766e+06	1.10715e+06	1.29492e+06	8.48036e+06	1.31797e+06	1.19003e+07
M280T705	3-Ketosphingosine	280.262	705.041	297.267	10.4959	C18H35NO2	C06121	[M+H-H2O]+	BioDeepDB	1.0879e-06	1.15451e+07	1.18925e+06	6.42871e+06	1.29105e+07	1.04738e+06	1.09592e+06	748510	5.90898e+06	4.30186e+06
M166T332	3-Methoxyanthranilate	166.05	332.42	167.058	5.84102	C8H9NO3	C05831	[M-H]-	BioDeepDB	0.091165	1.22936e+07	9.7575e+06	1.29978e+07	8.24952e+06	2.09713e+06	7.24014e+06	1.27741e+07	1.25461e+07	1.53748e+07
M113T449	3-Methyl-2-oxovaleric acid	113.06	448.868	130.063	4.69617	C6H10O3	C03465	[M+H-H2O]+	BioDeepDB	4.03065e-06	3.81852e+07	7.1617e+06	4.86099e+07	2.69293e+07	2.67811e+07	2.60288e+07	2.24766e+07	2.5346e+07	3.04508e+07
M150T146	3-Methyladenine	150.077	146.364	149.07	0.0292432	C6H7N5	C00913	[M+H]+	BioDeepDB	3.08033e-07	2.44236e+07	1.88879e+07	2.92687e+07	1.24223e+07	1.14804e+07	9.67686e+06	9.77556e+06	7.65103e+06	1.27609e+07
M132T393	3-Methylindole	132.044	392.62	131.073	18.6634	C9H9N	C08313	[M+H]+	BioDeepDB	0.00325051	4.0167e+07	2.47435e+07	3.09746e+07	6.40153e+07	5.16457e+07	4.50731e+07	2.10865e+07	2.0054e+07	2.48509e+07
M119T397	3-Methylthiopropionic acid	119.049	397.448	120.025	0.519388	C4H8O2S	C08276	[M-H]-	BioDeepDB	0.00155681	9.50263e+06	7.74509e+06	9.23147e+06	1.7879e+07	1.90953e+07	1.72697e+07	1.39591e+07	1.42308e+07	1.62354e+07
M165T329	3-Methylxanthine	165.04	329.416	166.049	2.62068	C6H6N4O2	C16357	[M-H]-	BioDeepDB	0.00451727	9.83061e+06	6.27485e+06	1.54426e+07	1.46032e+07	8.04591e+06	7.0323e+06	5.84951e+06	5.67588e+06	1.76108e+07
M243T684	3,3,45-Tetrahydroxystilbene	243.066	684.188	244.074	0.523422	C14H12O4	C05901	[M-H]-	BioDeepDB	0.00517254	4.39187e+06	3.29894e+06	5.3632e+06	7.10952e+06	8.80184e+06	8.09959e+06	5.25613e+06	3.31727e+06	7.35045e+06
M139T653	3,4-Dihydroxybenzaldehyde	139.039	652.524	138.032	0.82252	C7H6O3	C16700	[M+H]+	BioDeepDB	0.00615634	3.1589e+07	8.34601e+07	3.3525e+07	3.07241e+07	2.54476e+07	3.24408e+07	2.08795e+07	1.82851e+07	2.3948e+07
M183T467	3,4-Dihydroxymandelic acid	183.027	467.389	184.037	15.8635	C8H8O5	C05580	[M-H]-	BioDeepDB	0.0206522	8.34358e+07	4.91087e+07	1.00067e+08	2.04703e+08	1.92999e+08	1.29055e+08	1.29382e+08	2.08994e+07	2.63091e+07
M151T466	3,4-Dihydroxyphenylglycol	151.039	466.166	170.058	6.0964	C8H10O4	C05576	[M-H2O-H]-	BioDeepDB	7.2558e-05	3.72094e+07	9.84782e+07	4.58221e+07	5.00776e+07	5.2069e+07	2.23377e+07	2.90267e+07	2.36587e+07	3.34937e+07
M165T212	3,4-Dihydroxyphenylpropanoate	165.053	212.061	182.058	17.0181	C9H10O4	C10447	[M+H-H2O]+	mzCloud	2.00798e-10	1.17049e+08	7.6149e+07	9.35303e+07	1.10944e+08	1.04722e+08	9.22342e+07	2.13466e+08	1.31845e+08	2.14336e+08
M197T158	3,4-Dihydroxyphthalate	197.009	158.251	198.016	2.3507	C8H6O6	C03223	[M-H]-	MetaDNA	0.0132421	1.60177e+07	1.42484e+07	1.94648e+07	1.38922e+07	1.50156e+07	1.00574e+07	1.3513e+07	1.2834e+07	1.83059e+07
M194T685	3,4-Methylenedioxyamphetamine	194.117	684.61	193.11	1.90603	C11H15NO2	C07577	[M+H]+	BioDeepDB	0.163905	1.87629e+07	1.19562e+07	2.28009e+07	1.02982e+07	7.90485e+06	8.95428e+06	9.22432e+06	8.77842e+06	1.05825e+07
M208T245	4-(2-Aminophenyl)-2,4-dioxobutanoic acid	208.057	245.287	207.053	14.4058	C10H9NO4	C01252	[M+H]+	MetaDNA	0.0233055	3.08854e+07	6.45235e+06	2.65782e+07	2.48025e+07	1.41758e+07	2.27193e+07	4.12202e+06	3.46998e+06	1.30199e+07
M299T275	4-(beta-D-Glucosyloxy)benzoate	299.076	275.374	300.084	2.96307	C13H16O8	C03993	[M-H]-	MetaDNA	0.0117911	3.65501e+06	4.74373e+06	6.86664e+06	3.58308e+07	3.85572e+07	2.33501e+07	1.38054e+07	1.30576e+07	1.47794e+07
M321T460	4-Coumaroylshikimate	321.096	460.37	320.09	1.13847	C16H16O7	C02947	[M+H]+	BioDeepDB	9.17313e-19	1.65203e+07	2.31512e+07	2.34384e+07	1.88905e+07	3.48805e+07	1.42115e+07	1.06364e+07	1.1197e+07	1.5717e+07
M137T527	4-Fluoro-L-threonine	137.059	527.278	137.049	3.12562	C4H8FNO3	C15533	[M]+	BioDeepDB	1.00882e-07	4.19403e+07	3.178e+07	4.08299e+07	2.87808e+07	2.39707e+07	2.47666e+07	2.58861e+07	2.36886e+07	2.68087e+07
M146T102	4-Guanidinobutanoic acid	146.092	101.671	145.085	1.59512	C5H11N3O2	C01035	[M+H]+	BioDeepDB	4.37729e-16	7.72236e+07	6.5751e+07	7.14973e+07	3.97312e+07	4.18351e+07	4.73007e+07	7.18479e+07	6.82922e+07	1.10632e+08
M123T548	4-Hydroxybenzaldehyde	123.044	548.376	122.037	2.24256	C7H6O2	C00633	[M+H]+	BioDeepDB	0.00493748	3.29659e+07	7.05278e+07	1.16464e+08	1.63856e+08	1.46386e+08	3.07863e+07	4.41526e+07	1.15164e+08	1.36631e+08
M137T460	4-Hydroxybenzoic acid	137.023	460.377	138.032	12.35	C7H6O3	C00156	[M-H]-	BioDeepDB	1.06493e-07	6.70569e+07	7.10759e+07	1.06707e+08	2.46763e+08	1.18428e+08	8.2405e+07	6.49844e+07	7.33502e+07	2.00654e+08
M163T360_1	4-Hydroxycinnamic acid	163.039	359.628	164.047	0.631356	C9H8O3	C00811	[M-H]-	BioDeepDB	3.71926e-23	5.54847e+08	4.51373e+08	5.82487e+08	7.59912e+08	7.25218e+08	7.08774e+08	6.10276e+08	5.94489e+08	7.72567e+08
M163T406	4-Hydroxycoumarin	163.039	405.98	162.032	1.23055	C9H6O3	C20414	[M+H]+	BioDeepDB	0.00258222	2.28925e+07	2.02431e+07	2.29422e+07	3.58816e+07	2.9792e+07	2.96683e+07	2.18788e+07	2.38699e+07	2.50909e+07
M180T624	4-Hydroxyphenylpyruvic acid	180.044	623.538	180.042	0.742518	C9H8O4	C01179	[M]+	BioDeepDB	8.42797e-10	5.23316e+06	1.62964e+07	1.30409e+07	1.46429e+07	1.64339e+07	1.74774e+07	3.54573e+06	2.24152e+07	1.64463e+07
M175T716	4-Methylumbelliferone	175.039	715.588	176.047	4.91044	C10H8O3	C03081	[M-H]-	MoNA	0.000649101	4.13388e+06	3.95328e+06	6.92365e+06	1.56184e+06	1.28933e+06	1.51444e+06	1.20756e+06	1.22318e+06	1.46811e+06
M138T624	4-Nitrophenol	138.019	623.689	139.027	4.61154	C6H5NO3	C00870	[M-H]-	BioDeepDB	1.68971e-06	5.64755e+07	4.11573e+07	5.87583e+07	4.04835e+07	4.36464e+07	4.10701e+07	5.9295e+07	5.5441e+07	6.23386e+07
M325T214	4-O-beta-D-Glucosyl-4-hydroxycinnamate	325.093	214.332	326.1	0.571006	C15H18O8	C04415	[M-H]-	MetaDNA	0.0141155	2.40751e+06	1.71055e+07	832001	4.16609e+07	2.46441e+07	2.27372e+07	3.37567e+07	1.99524e+07	1.86184e+07
M183T306	4-Pyridoxic acid	182.986	306.322	183.053	0.0773237	C8H9NO4	C00847	[M]+	BioDeepDB	3.8079e-24	5.54261e+08	5.2752e+08	3.50566e+08	3.33082e+08	8.35708e+07	1.13244e+08	4.12346e+08	2.57594e+08	8.67626e+07
M173T639	4-Quinolinecarboxylic acid	173.118	638.812	173.048	6.18621	C10H7NO2	C06414	[M]-	BioDeepDB	0.0007483	1.47386e+07	6.84323e+07	2.04318e+07	1.22876e+07	1.8833e+07	1.11963e+07	1.09787e+07	2.83178e+06	8.03066e+06
M159T183	4,5-Dihydroorotic acid	158.961	182.901	158.033	1.25006	C5H6N2O4	C00337	[M+H]+	BioDeepDB	0.00280142	1.4514e+07	1.1929e+07	3.08563e+07	9.74493e+06	3.69479e+07	3.61624e+07	2.26461e+07	2.55008e+07	5.90928e+06
M143T434	5-(2-Hydroxyethyl)-4-methylthiazole	143.038	434.407	143.041	11.1186	C6H9NOS	C04294	[M]+	BioDeepDB	0.000817532	1.21375e+08	1.10813e+07	2.54631e+07	2.10803e+07	8.5756e+07	4.38999e+06	5.79974e+06	2.08018e+06	3.06592e+07
M142T374	5-Acetamidovalerate	142.086	373.856	159.089	29.2907	C7H13NO3	C03087	[M+H-H2O]+	MetaDNA	0.00622949	7.1922e+07	5.70358e+07	8.66511e+07	8.75375e+06	1.88794e+07	3.74572e+07	9.81421e+06	9.04149e+06	2.27153e+07
M126T144	5-Aminoimidazole-4-carboxamide	126.055	143.615	126.054	3.03311	C4H6N4O	C04051	[M]+	BioDeepDB	0.189131	8.82261e+07	8.53037e+07	1.17939e+08	9.28941e+07	7.07368e+07	6.11121e+07	8.7621e+07	7.25669e+07	9.80299e+07
M191T834	5-Hydroxyindoleacetic acid	191.107	834.325	191.058	0.890315	C10H9NO3	C05635	[M]-	BioDeepDB	8.41998e-26	3.40346e+07	3.5301e+07	6.46656e+07	3.22913e+07	6.61524e+07	2.30252e+07	2.23971e+07	6.4586e+07	6.55736e+07
M145T223	5-Hydroxylysine	145.097	222.874	162.1	26.5652	C6H14N2O3	C16741	[M+H-H2O]+	MoNA	0.00239777	5.09202e+07	2.20239e+07	4.85684e+07	2.43018e+07	2.66136e+07	1.42454e+07	1.3453e+07	1.21901e+07	2.58292e+07
M142T225	5-Hydroxymethyluracil	141.959	224.709	142.038	1.74201	C5H6N2O3	C03088	[M]+	BioDeepDB	8.34613e-07	1.19138e+08	4.12835e+07	1.29692e+08	3.16148e+07	2.96452e+08	1.08791e+08	2.62571e+08	6.20243e+07	8.247e+07
M298T387	5-Methylthioadenosine	298.096	386.921	297.09	1.41925	C11H15N5O3S	C00170	[M+H]+	BioDeepDB	7.32365e-37	4.19948e+08	3.06249e+08	4.34045e+08	7.41346e+08	5.7391e+08	4.47924e+08	5.66218e+08	5.01282e+08	5.58511e+08
M315T334	5-Phosphoribosyl-N-formylglycinamide	315.07	333.852	314.051	1.12247	C8H15N2O9P	C04376	[M+H]+	BioDeepDB	8.45838e-05	3.26565e+07	3.18958e+07	3.96505e+07	2.99576e+07	2.60992e+07	3.0726e+07	3.77058e+07	2.92938e+07	3.08358e+07
M189T308	6-Acetamido-3-aminohexanoate	189.123	308.337	188.116	0.792485	C8H16N2O3	C03846	[M+H]+	BioDeepDB	1.33952e-05	3.88437e+07	3.29934e+07	1.06768e+06	1.36456e+08	6.67739e+07	9.57261e+07	6.15976e+07	1.10777e+08	9.46275e+07
M138T93	6-Hydroxynicotinic acid	138.018	93.4921	139.027	8.63243	C6H5NO3	C01020	[M-H]-	BioDeepDB	5.65808e-09	2.65181e+07	2.0309e+07	3.25025e+07	9.91948e+06	1.1837e+07	1.20343e+07	8.13752e+06	9.94803e+06	1.46639e+07
M209T590	6-Methoxymellein	209.08	589.861	208.074	3.80053	C11H12O4	C02381	[M+H]+	BioDeepDB	9.23772e-05	2.94827e+07	1.8547e+07	2.47719e+07	1.17865e+07	1.30329e+07	9.88072e+06	1.22446e+07	1.67247e+07	1.46143e+07
M301T159	6-O-Methylnorlaudanosoline	301.138	159.119	301.131	6.89616	C17H19NO4	C05203	[M]+	BioDeepDB	0.000264072	2.86617e+06	2.3233e+06	7.95885e+06	2.72663e+07	1.4879e+07	2.86679e+07	5.95351e+07	1.52994e+07	1.84331e+07
M303T831	6beta-Hydroxytestosterone	303.199	830.517	304.204	8.82719	C19H28O3	C14497	[M-H]-	BioDeepDB	0.0158823	3.05389e+07	6.62676e+06	1.97064e+07	1.00693e+07	2.10404e+07	1.00917e+07	2.21517e+07	1.62289e+07	1.85214e+07
M630T408	7(1)-Hydroxychlorophyllide a	630.177	407.677	630.233	7.3851	C35H34MgN4O6	C16540	[M]+	BioDeepDB	2.64269e-20	2.23468e+07	1.60543e+07	2.00535e+07	2.35037e+07	1.9742e+07	2.01841e+07	1.62993e+07	1.45146e+07	1.32674e+07
M146T398	8-Hydroxyquinoline	146.06	398.29	145.053	0.915333	C9H7NO	C19434	[M+H]+	BioDeepDB	8.76342e-05	2.7557e+07	1.9719e+07	2.82358e+07	4.55217e+07	4.50257e+07	3.50863e+07	4.57499e+07	3.40969e+07	4.20706e+07
M295T705	9-OxoODE	295.226	705.168	294.219	3.29469	C18H30O3	C14766	[M+H]+	mzCloud	2.62055e-06	2.91825e+07	1.78549e+07	2.7792e+07	2.08749e+07	2.28363e+07	1.65494e+07	1.48164e+07	1.51428e+07	1.45396e+07
M313T801	9,10-DHOME	313.238	801.04	314.246	1.26163	C18H34O4	C14828	[M-H]-	BioDeepDB	2.24352e-09	1.88157e+07	1.73159e+07	2.39777e+07	1.40263e+07	1.43767e+07	1.34179e+07	1.56429e+07	1.62621e+07	1.64334e+07
M293T832	9(S)-HPOT	293.211	832.165	310.214	0.0124873	C18H30O4	C16321	[M+H-H2O]+	BioDeepDB	5.00515e-07	1.46271e+08	9.09463e+07	1.3599e+08	8.59363e+07	1.00922e+08	8.62886e+07	1.04225e+08	8.40211e+07	1.07278e+08
M219T405	Abrine	219.112	405.365	218.106	2.96802	C12H14N2O2	C02983	[M+H]+	MetaDNA	0.0184669	3.4753e+07	2.1013e+07	3.91656e+07	2.69542e+07	3.44757e+07	2.64022e+07	2.99417e+07	2.1206e+07	3.30939e+07
M152T506	Acetaminophen	152.07	506.156	151.063	3.01879	C8H9NO2	C06804	[M+H]+	BioDeepDB	1.63643e-06	2.39958e+07	1.86778e+07	2.72167e+07	2.68182e+07	2.60327e+07	2.13396e+07	1.77683e+07	1.63423e+07	3.27359e+07
M146T387	Acetylcholine	146.117	387.36	146.118	0.639731	C7H16NO2	C01996	[M+H]+	BioDeepDB	0.656224	7.33573e+06	2.27279e+07	3.87171e+07	4.36696e+07	3.16188e+07	2.80031e+07	4.13505e+07	3.38451e+07	4.67469e+07
M163T654	Acetylcysteine	163.039	653.996	163.03	0.49053	C5H9NO3S	C06809	[M]+	BioDeepDB	0.00389056	1.71531e+07	1.04465e+07	1.5483e+07	3.43549e+07	7.14066e+06	1.99302e+07	2.57089e+07	2.0056e+07	2.33781e+07
M140T737	Acetylphosphate	139.987	736.722	139.988	1.22431	C2H5O5P	C00227	[M]+	BioDeepDB	0.199622	3.09355e+07	7.70295e+07	7.78495e+07	1.95857e+07	1.86567e+07	3.35706e+07	5.79921e+07	3.03762e+07	2.90783e+07
M134T296_1	Adenine	134.045	296.252	135.054	4.48553	C5H5N5	C00147	[M-H]-	BioDeepDB	6.13063e-22	1.12876e+09	8.41006e+08	1.31682e+09	7.06797e+08	6.85997e+08	6.73775e+08	6.44852e+08	6.0873e+08	7.98838e+08
M268T281_2	Adenosine	268.104	280.551	267.097	0.372127	C10H13N5O4	C00212	[M+H]+	BioDeepDB	5.40333e-23	3.34397e+09	2.72443e+09	3.85588e+09	2.7579e+09	2.84113e+09	1.71175e+09	3.2621e+09	2.73449e+09	3.46316e+09
M177T607	Aesculetin	177.019	607.438	178.027	3.89456	C9H6O4	C09263	[M-H]-	BioDeepDB	2.71618e-07	1.81327e+07	1.41167e+07	4.88148e+06	2.62745e+07	2.48587e+07	1.27505e+07	8.56354e+06	1.07365e+07	1.18588e+07
M131T78	Agmatine	131.129	78.134	130.122	0.844712	C5H14N4	C00179	[M+H]+	BioDeepDB	0.000306913	9.85188e+06	7.01346e+06	1.17018e+07	2.66602e+06	3.37923e+06	2.69871e+06	1.2319e+07	1.28353e+07	1.61191e+07
M411T598	Aklaviketone	411.105	597.608	410.1	6.03774	C22H18O8	C12423	[M+H]+	BioDeepDB	0.00170945	1.82281e+07	9.21057e+06	1.99816e+07	1.78793e+07	1.49703e+07	1.42074e+07	1.89309e+07	1.34299e+07	1.83035e+07
M300T434	all-trans-Retinoic acid	300.198	434.407	300.209	1.30522	C20H28O2	C00777	[M]+	BioDeepDB	0.00151309	2.48923e+07	2.16996e+07	2.21384e+07	1.88173e+07	1.90876e+07	5.1448e+06	1.57921e+07	3.85848e+06	1.24754e+07
M158T187	Allantoin	158.047	187.203	158.044	18.0135	C4H6N4O3	C01551	[M]+	BioDeepDB	0.00133713	9.59542e+06	9.28873e+06	1.23223e+07	2.04017e+07	1.82956e+07	1.69464e+07	1.77797e+07	1.70187e+07	1.80791e+07
M181T638	Alpha-D-Glucose	181.07	638.475	180.063	5.4698	C6H12O6	C00267	[M+H]+	BioDeepDB	0.000175463	3.41658e+07	2.75018e+07	1.14167e+08	1.51069e+08	1.4904e+08	6.01615e+07	2.39643e+07	6.31285e+07	8.67361e+07
M279T793	Alpha-Linolenic acid	279.231	792.987	278.225	3.72067	C18H30O2	C06427	[M+H]+	BioDeepDB	1.03875e-13	2.76963e+07	2.19516e+07	2.65015e+07	2.17605e+07	2.20496e+07	1.9383e+07	2.65462e+07	2.33326e+07	2.46862e+07
M149T536	alpha-Oxo-benzeneacetic acid	149.023	536.271	150.032	9.38297	C8H6O3	C02137	[M-H]-	mzCloud	0.000110232	1.84584e+07	3.8226e+07	1.83085e+07	1.77894e+07	1.75209e+07	1.62651e+07	1.06674e+07	1.0275e+07	1.43869e+07
M430T534	alpha-Tocopherol	430.24	534.186	430.381	5.33046	C29H50O2	C02477	[M]+	BioDeepDB	3.68864e-08	2.89737e+07	2.44618e+07	2.47514e+07	2.29573e+07	1.98218e+07	1.61981e+07	1.78344e+07	1.80592e+07	1.28504e+07
M142T101	Aminoadipic acid	142.05	101.456	161.069	6.33993	C6H11NO4	C00956	[M-H2O-H]-	BioDeepDB	0.0477008	1.22041e+08	8.53577e+07	1.72757e+08	6.14212e+07	5.76337e+07	5.63607e+07	6.5979e+07	5.43548e+07	7.74148e+07
M209T422	Aminocarb	209.128	421.641	208.121	1.33586	C11H16N2O2	C11071	[M+H]+	BioDeepDB	9.51609e-07	6.70228e+07	5.71619e+07	6.88534e+07	4.11416e+07	3.6499e+07	3.7575e+07	1.00193e+08	8.55952e+07	8.65015e+07
M126T172	Aminohydroquinone	126.055	171.688	125.048	2.69477	C6H7NO2	C14604	[M+H]+	BioDeepDB	7.02836e-13	2.57763e+07	8.7518e+07	1.14057e+08	1.91524e+07	1.76333e+07	6.63906e+07	1.12838e+08	7.49874e+07	1.03114e+08
M346T151_1	AMP	346.054	151.058	347.063	5.41412	C10H14N5O7P	C00020	[M-H]-	BioDeepDB	8.74747e-07	1.43412e+07	1.55747e+07	337264	1.69498e+07	263205	434534	2.30254e+07	401381	2.15955e+07
M457T323_2	Amygdalin	457.172	323.049	457.158	29.5393	C20H27NO11	C08325	[M]-	BioDeepDB	0.000117629	4.21128e+06	3.53865e+06	3.42794e+06	9.4954e+06	1.10689e+07	8.3515e+06	8.71604e+06	8.50335e+06	9.8588e+06
M163T461	Anabasine	163.039	461.306	162.116	3.50729	C10H14N2	C06180	[M+H]+	BioDeepDB	5.05215e-14	2.23935e+07	2.06642e+07	3.35775e+07	4.41041e+07	3.88081e+07	3.98577e+07	1.65968e+07	3.19521e+07	1.6561e+07
M161T420	Anatabine	161.107	420.229	160.1	1.17043	C10H12N2	C10126	[M+H]+	BioDeepDB	5.72761e-07	3.28614e+07	7.7465e+07	4.43279e+07	616984	3.4289e+06	3.72947e+06	7.01754e+07	3.95316e+07	2.92614e+07
M209T467	Anhalamine	209.102	467.14	209.105	13.2336	C11H15NO3	C12231	[M]+	BioDeepDB	1.43634e-05	8.65114e+07	7.23007e+07	1.01926e+08	6.90733e+07	6.08019e+07	5.56789e+07	3.89344e+07	4.02486e+07	4.1241e+07
M184T315	Antiarol	184.071	315.167	184.074	11.7864	C9H12O4	C10765	[M]+	BioDeepDB	0.00148193	3.56283e+07	1.5363e+07	4.067e+07	1.80151e+07	1.86423e+07	1.77373e+07	9.58737e+06	1.23071e+07	1.55464e+07
M482T839	Antibiotic JI-20A	482.322	839.313	481.275	4.50777	C19H39N5O9	C17704	[M+H]+	BioDeepDB	1.3872e-05	1.26242e+07	8.11964e+06	1.29737e+07	7.97263e+06	6.27653e+06	5.74198e+06	7.18395e+06	6.58915e+06	6.0311e+06
M270T685	Apigenin	270.049	685.359	270.053	2.8803	C15H10O5	C01477	[M]-	BioDeepDB	2.50876e-09	2.98515e+07	2.35872e+07	2.65193e+07	1.9086e+07	1.94067e+07	1.66784e+07	3.52439e+07	2.90919e+07	3.55513e+07
M223T564	Apiole	223.094	563.684	222.089	0.579938	C12H14O4	C10429	[M+H]+	BioDeepDB	0.00221109	1.42466e+07	8.39201e+06	1.55183e+07	1.22761e+07	1.00864e+07	9.84388e+06	9.77208e+06	1.03257e+07	1.02868e+07
M287T523	Aromadendrin	287.056	522.879	288.063	1.55065	C15H12O6	C00974	[M-H]-	MetaDNA	0.000243527	1.88553e+07	4.30599e+07	6.48521e+07	1.3689e+08	1.51737e+08	1.12509e+08	1.27444e+08	2.01846e+08	2.36439e+08
M449T512	Astilbin	449.107	511.803	450.116	4.41368	C21H22O11	C17449	[M-H]-	mzCloud	0.000235739	1.01158e+07	9.1927e+06	3.59526e+06	2.24733e+07	1.67096e+07	1.34635e+07	2.21751e+07	1.74562e+07	1.76436e+07
M287T563	Aureusidin	287.061	563.083	286.048	22.1262	C15H10O6	C08576	[M+H]+	MetaDNA	0.028886	3.98123e+07	1.78265e+07	7.7271e+06	6.46446e+07	2.63563e+07	9.29186e+06	4.81857e+07	2.20229e+07	9.54188e+06
M553T757	Avermectin B1b aglycone	553.298	757.146	570.319	24.9716	C33H46O8	C11963	[M+H-H2O]+	BioDeepDB	0.0172823	2.91667e+06	1.1991e+06	2.77713e+06	2.69314e+06	4.44257e+06	597713	8.3263e+06	9.85105e+06	5.82133e+06
M187T779	Azelaic acid	187.098	778.569	188.105	3.28664	C9H16O4	C08261	[M-H]-	BioDeepDB	3.69368e-22	4.00103e+07	8.18367e+07	2.28544e+07	5.22174e+06	1.82254e+07	2.97277e+07	3.47946e+07	1.19452e+07	1.39725e+07
M107T552	Benzaldehyde	107.05	551.849	106.042	3.26946	C7H6O	C00261	[M+H]+	BioDeepDB	4.35414e-08	1.41567e+07	1.06535e+07	1.96057e+07	3.42352e+07	3.225e+07	2.24476e+07	2.37915e+07	1.9832e+07	2.65204e+07
M127T99	Benzene-1,2,4-triol	127.039	99.3747	126.032	2.70281	C6H6O3	C02814	[M+H]+	MetaDNA	0.0118621	7.60695e+08	2.44013e+08	2.09719e+08	2.02864e+08	2.21422e+08	2.00838e+08	1.89501e+08	3.45768e+08	1.74803e+08
M121T667	Benzoate	121.029	666.683	122.037	7.86239	C7H6O2	C00180	[M-H]-	mzCloud	0.000358706	1.35933e+07	1.59418e+07	2.77382e+07	4.54922e+06	1.66376e+07	3.2943e+07	3.05162e+07	1.65134e+07	2.11164e+07
M132T307	Beta-Leucine	132.101	306.591	131.095	3.66373	C6H13NO2	C02486	[M+H]+	BioDeepDB	6.37356e-05	2.56396e+08	1.65593e+08	2.33845e+08	1.61292e+08	1.54801e+08	1.36796e+08	2.11906e+08	1.35534e+08	1.9681e+08
M205T798	beta-Selinene	205.195	797.646	204.188	1.87631	C15H24	C09723	[M+H]+	BioDeepDB	1.93165e-15	2.26507e+07	1.49173e+07	1.60313e+07	1.78869e+07	8.96522e+06	7.48655e+06	1.94226e+07	2.65475e+07	1.82167e+07
M182T555	Beta-Tyrosine	182.081	555.359	181.074	0.0328998	C9H11NO3	C04368	[M+H]+	BioDeepDB	0.00452554	5.4952e+07	3.88767e+07	6.84345e+07	2.3325e+07	3.164e+07	1.97125e+07	3.2229e+07	2.61491e+07	5.06345e+07
M373T424	Biocytin	373.183	423.769	372.183	19.4288	C16H28N4O4S	C05552	[M+H]+	mzCloud	2.54566e-05	4.85903e+06	1.20279e+06	6.8209e+06	2.93839e+07	6.14381e+06	1.30783e+07	4.74454e+06	4.49131e+06	1.12884e+06
M498T307_2	Bis-gamma-glutamylcystine	498.124	307.147	498.109	0.294138	C16H26N4O10S2	C03646	[M]+	BioDeepDB	5.98148e-06	2.68002e+07	2.2724e+07	2.53189e+07	8.06314e+07	6.32953e+07	4.32692e+07	5.05616e+07	4.18437e+07	5.40451e+07
M279T763	Bovinic acid	279.235	763.423	280.24	5.87768	C18H32O2	C04056	[M-H]-	BioDeepDB	1.24395e-08	1.48066e+07	1.61383e+08	3.9627e+08	4.80816e+08	4.17716e+07	1.61673e+08	1.35365e+08	5.1799e+08	2.79543e+08
M273T548	Butein	273.075	548.398	272.068	2.09902	C15H12O5	C08578	[M+H]+	BioDeepDB	1.11938e-16	1.65311e+08	1.02067e+08	1.72629e+08	2.45665e+08	2.18922e+08	1.64861e+08	1.70908e+08	1.68451e+08	2.01426e+08
M307T439	Bz-Arg-OEt	307.175	439.479	306.169	3.76407	C15H22N4O3	C01670	[M+H]+	mzCloud	0.0813206	8.80516e+06	6.26435e+06	9.91084e+06	3.2017e+07	3.30966e+07	2.60251e+07	1.58906e+07	1.07813e+07	1.54716e+07
M181T406	Caffeate	181.049	405.987	180.042	2.54037	C9H8O4	C01197	[M+H]+	BioDeepDB	1.02305e-07	5.8938e+07	4.49075e+07	5.10889e+07	7.85612e+07	6.89003e+07	6.371e+07	5.13087e+07	4.67471e+07	5.55422e+07
M195T441_2	Caffeine	195.088	441.179	194.08	0.0213186	C8H10N4O2	C07481	[M+H]+	BioDeepDB	4.41993e-16	7.68642e+10	5.6097e+10	5.69009e+10	9.59916e+10	9.09582e+10	5.33723e+10	6.66802e+10	4.47208e+10	5.59881e+10
M177T332	Canavanine	177.102	332.48	176.091	20.6175	C5H12N4O3	C00308	[M+H]+	MoNA	5.47757e-05	6.11085e+07	6.83125e+07	6.31708e+07	1.30989e+07	1.31753e+07	1.2859e+07	3.00233e+07	2.65044e+07	3.13891e+07
M219T681_2	Capsidiol	219.174	681.354	236.178	0.0238324	C15H24O2	C09627	[M+H-H2O]+	BioDeepDB	3.59882e-13	3.79023e+07	2.49881e+07	1.89812e+07	6.06344e+07	4.70845e+07	4.05254e+07	3.4208e+07	4.2768e+07	4.36868e+07
M351T812	Carboprost	351.252	811.735	368.256	0.515882	C21H36O5	C06872	[M+H-H2O]+	BioDeepDB	1.77679e-29	6.92423e+07	2.06827e+07	4.45924e+07	3.47692e+07	2.03767e+07	1.52268e+07	7.01294e+07	8.97424e+07	5.33701e+07
M513T639	Carminomycin	513.173	639.219	513.163	17.6677	C26H27NO10	C12432	[M]+	MetaDNA	0.041072	1.31545e+07	1.16585e+07	2.1884e+07	1.22743e+07	1.16471e+07	6.78578e+06	2.27125e+07	1.70014e+07	2.37372e+07
M227T752	Carnosine	227.117	752.099	226.107	14.2309	C9H14N4O3	C00386	[M+H]+	MetaDNA	0.0544856	8.62212e+06	5.3494e+06	1.05722e+07	8.94327e+06	6.27522e+06	5.95853e+06	6.10179e+06	5.96625e+06	9.26858e+06
M203T668	Caryophyllene epoxide	203.179	667.827	220.183	16.9873	C15H24O	C16908	[M+H-H2O]+	mzCloud	4.54331e-11	3.1051e+07	1.81321e+07	2.69385e+07	4.27826e+07	3.68647e+07	2.88206e+07	4.6536e+07	4.66802e+07	4.81992e+07
M289T567	Catechin	289.071	567.304	290.079	1.60018	C15H14O6	C06562	[M-H]-	mzCloud	1.18242e-12	5.43496e+06	1.67355e+07	8.79698e+06	6.39366e+07	1.89776e+07	3.01179e+07	1.87313e+08	2.75533e+07	1.67804e+07
M335T369	Chlorogenic acid	335.076	368.661	354.095	1.09776	C16H18O9	C00852	[M-H2O-H]-	MoNA	1.12097e-05	2.21432e+07	1.82444e+07	2.41658e+07	8.72105e+07	5.46399e+07	5.29106e+07	2.63235e+07	2.46556e+07	3.81729e+07
M301T697	Chrysoeriol	301.07	697.476	300.063	2.27418	C16H12O6	C04293	[M+H]+	MoNA	1.65253e-06	1.90995e+07	1.05736e+07	1.99674e+07	4.67187e+06	4.22359e+06	3.88424e+06	9.52136e+06	8.76538e+06	8.10386e+06
M126T224	Ciliatine	125.986	224.36	125.024	3.09232	C2H8NO3P	C03557	[M+H]+	BioDeepDB	0.000266004	6.84765e+08	6.82964e+08	5.37714e+08	5.69106e+08	5.12311e+08	5.58565e+08	3.93354e+08	4.9398e+08	4.96012e+08
M305T369_1	cis-Dihydroquercetin	305.065	368.954	304.058	2.37639	C15H12O7	C12316	[M+H]+	MetaDNA	0.0438995	6.46443e+07	6.04797e+07	4.61298e+07	7.81612e+07	4.63456e+07	6.65032e+07	4.04254e+07	3.33593e+07	3.879e+07
M129T101	Citramalic acid	129.017	101.456	148.037	10.4704	C5H8O5	C00815	[M-H2O-H]-	MoNA	1.13426e-06	2.6918e+08	2.37085e+08	4.71431e+08	2.57484e+08	2.47733e+08	2.68716e+08	2.44968e+08	2.45413e+08	3.44091e+08
M516T399	Coenzyme F420-0	516.147	399.224	515.094	8.4104	C19H22N3O12P	C19153	[M+H]+	BioDeepDB	3.13978e-12	3.69674e+06	9.23955e+06	1.45988e+07	1.90752e+07	1.49349e+07	1.64955e+07	2.40813e+07	1.75971e+07	2.48958e+07
M233T596	Costunolide	233.153	595.742	232.146	1.8251	C15H20O2	C09382	[M+H]+	MoNA	1.27037e-06	1.04332e+07	7.21358e+06	1.03636e+07	2.04137e+07	1.68023e+07	1.37647e+07	2.02037e+07	1.95659e+07	2.49522e+07
M147T688	Coumarin	147.044	688.245	146.037	0.295913	C9H6O2	C05851	[M+H]+	BioDeepDB	9.01209e-16	3.84876e+07	2.61335e+07	3.25553e+07	4.04982e+07	3.66221e+07	3.23353e+07	3.93516e+07	3.37147e+07	4.0424e+07
M113T697	Creatinine	112.984	696.808	113.059	0.0285034	C4H7N3O	C00791	[M]-	BioDeepDB	1.93218e-17	2.54928e+07	5.67358e+07	6.89956e+07	3.2828e+07	4.40922e+07	2.93136e+07	2.34609e+07	2.12413e+07	1.55984e+07
M611T330_2	Cyanidin 3-(6-p-caffeoyl)glucoside	611.14	329.74	611.14	0.0243422	C30H27O14	C16369	[M]+	BioDeepDB	3.63365e-05	1.26096e+07	9.70027e+06	9.15022e+06	1.60062e+07	1.30746e+07	1.3483e+07	1.96133e+07	1.41429e+07	1.43177e+07
M449T517_1	Cyanidin 3-glucoside	449.103	516.879	449.108	10.5436	C21H21O11	C08604	[M+H]+	BioDeepDB	1.8575e-12	3.32143e+07	3.7178e+07	4.50912e+07	2.73376e+07	2.145e+07	2.5835e+07	4.21586e+07	2.7184e+07	1.35651e+07
M889T570_2	Cyanidin 3-O-[6-O-(6-O-4-hydroxycinnamoyl-beta-D-glucosyl)-2-O-beta-D-xylosyl-beta-D-galactoside]	889.231	569.625	889.24	3.16032	C41H45O22	C20460	[M]+	BioDeepDB	5.63377e-07	4.99739e+06	4.52389e+06	1.78564e+06	7.20316e+06	8.02216e+06	6.90706e+06	1.02351e+07	3.49617e+06	1.29265e+07
M611T349_2	Cyanidin 3-O-sophoroside	611.14	348.846	611.161	0.22074	C27H31O16	C16306	[M]+	BioDeepDB	5.5748e-07	1.72562e+07	1.67496e+07	2.59758e+07	5.57302e+07	3.69751e+07	4.41034e+07	4.93894e+07	6.26655e+06	2.69836e+07
M328T318	Cyclic AMP	328.045	318.311	329.053	0.607096	C10H12N5O6P	C00575	[M-H]-	BioDeepDB	6.5723e-12	5.01294e+07	3.87368e+07	6.18945e+07	3.40884e+07	3.70335e+07	3.38226e+07	4.5798e+07	3.82869e+07	4.097e+07
M242T170	Cytidine	242.077	170.182	243.085	2.46898	C9H13N3O5	C00475	[M-H]-	BioDeepDB	0.00141122	1.00354e+07	7.64143e+06	1.22141e+07	7.64028e+06	8.79435e+06	7.35503e+06	9.18488e+06	8.49552e+06	9.01947e+06
M112T92	Cytosine	112.051	91.5264	111.043	0.398682	C4H5N3O	C00380	[M+H]+	BioDeepDB	5.91131e-23	1.95037e+08	1.50088e+08	1.94689e+08	7.98843e+07	7.09146e+07	7.2474e+07	4.82939e+07	4.19571e+07	5.92585e+07
M128T223	D-1-Piperideine-2-carboxylic acid	128.07	222.542	127.063	1.49383	C6H9NO2	C04092	[M+H]+	BioDeepDB	1.10852e-06	3.78757e+08	2.829e+08	3.56771e+08	1.86064e+08	1.85144e+08	1.11583e+08	2.18948e+08	2.6518e+08	2.32129e+08
M152T536	D-Arabitol	152.07	536.354	152.069	10.6198	C5H12O5	C01904	[M]+	BioDeepDB	6.37367e-10	5.45532e+07	4.1449e+07	6.70659e+07	3.00279e+07	2.55447e+07	2.14554e+07	4.74201e+07	4.23115e+07	5.69947e+07
M150T485	D-Cathinone	150.091	485.249	149.084	1.63948	C9H11NO	C08301	[M+H]+	BioDeepDB	1.1836e-08	2.56212e+07	1.87431e+07	2.63465e+07	1.45482e+07	1.38488e+07	1.05394e+07	2.38862e+07	2.2892e+07	2.44876e+07
M181T748	D-Fructose	181.07	748.014	180.063	3.69187	C6H12O6	C00095	[M+H]+	BioDeepDB	8.91014e-08	6.35909e+07	5.27597e+07	8.20433e+07	1.87497e+07	1.95039e+07	8.75217e+07	5.31973e+07	1.90939e+07	5.26381e+07
M181T426	D-Galactose	181.07	426.284	180.063	4.21432	C6H12O6	C00984	[M+H]+	BioDeepDB	7.72808e-05	5.82811e+08	3.98187e+08	5.25283e+08	1.79371e+09	2.70875e+08	1.23092e+09	4.65587e+08	1.13905e+08	1.33245e+08
M259T80	D-Glucose 1-phosphate	259.022	80.1179	260.03	0.163201	C6H13O9P	C00103	[M-H]-	mzCloud	1.20315e-06	2.03977e+07	2.20815e+07	2.16997e+07	4.57828e+06	1.90641e+07	1.83406e+07	2.70195e+07	2.37569e+07	2.22541e+07
M193T102_1	D-Glucuronic acid	193.034	101.95	194.043	5.8736	C6H10O7	C00191	[M-H]-	BioDeepDB	0.263828	6.00908e+08	5.61384e+08	8.50294e+08	8.13251e+08	6.94128e+08	6.0071e+08	7.37319e+08	6.96525e+08	8.3192e+08
M219T158	D-Lysopine	219.133	157.884	218.127	2.41064	C9H18N2O4	C04020	[M+H]+	BioDeepDB	0.0625796	6.63925e+06	5.52209e+06	8.238e+06	2.18113e+07	1.74747e+07	1.47239e+07	2.33742e+07	1.82739e+07	1.96649e+07
M151T612	D-Lyxose	151.036	611.718	150.053	9.93977	C5H10O5	C00476	[M+H]+	BioDeepDB	9.39995e-07	3.038e+07	2.62385e+07	1.38154e+07	1.08987e+07	7.37613e+06	7.82837e+06	7.48739e+06	3.58373e+07	4.37929e+07
M180T108	D-Mannose	180.066	108.452	180.063	13.355	C6H12O6	C00159	[M]-	BioDeepDB	7.56337e-07	2.76922e+06	2.46316e+06	1.10675e+07	1.00621e+07	1.25356e+07	1.01415e+07	2.28532e+07	4.13599e+06	2.67985e+07
M151T184	D-Ribose	151.035	183.512	150.053	3.19518	C5H10O5	C00121	[M+H]+	BioDeepDB	0.000656369	1.38477e+08	1.43631e+08	1.37227e+07	1.2457e+07	1.3246e+07	1.46456e+07	1.19154e+07	4.82969e+07	1.17488e+07
M153T796	D-Xylitol	153.127	795.872	152.069	2.73369	C5H12O5	C00379	[M+H]+	BioDeepDB	9.99349e-10	4.1997e+07	2.29378e+07	5.15195e+07	3.95601e+07	3.81836e+07	2.99467e+07	3.44978e+07	4.76377e+07	3.9153e+07
M269T783	Dehydroepiandrosterone	269.21	782.529	288.209	8.62455	C19H28O2	C01227	[M-H2O-H]-	BioDeepDB	1.08847e-13	3.27019e+06	1.44734e+07	3.93001e+07	3.35222e+06	1.44529e+07	2.98197e+06	1.74362e+06	5.32121e+06	1.09054e+07
M611T600_2	Delphinidin 3-rutinoside	611.139	600.467	611.161	0.00116375	C27H31O16	C16315	[M]+	BioDeepDB	0.00179534	2.38785e+07	1.45482e+07	1.94226e+07	4.31277e+07	3.53858e+07	3.30555e+07	3.29864e+07	1.89848e+07	5.59628e+07
M391T824	Deoxycholic acid	391.262	823.561	392.293	24.3758	C24H40O4	C04483	[M-H]-	BioDeepDB	0.00117549	1.17984e+07	4.88463e+06	9.73287e+06	5.65197e+06	1.13766e+07	5.8746e+06	1.4243e+07	1.64169e+07	1.58099e+07
M228T759	Deoxycytidine	228.101	758.574	227.091	13.0681	C9H13N3O4	C00881	[M+H]+	BioDeepDB	1.25878e-08	4.30792e+07	3.01157e+07	5.1632e+07	2.80552e+07	2.03188e+07	1.84846e+07	3.82328e+07	3.1719e+07	4.0916e+07
M167T313	Desaminotyrosine	167.012	313.005	166.063	2.04559	C9H10O3	C01744	[M+H]+	BioDeepDB	0.0116106	2.25565e+08	3.2627e+08	1.25793e+08	5.01821e+07	1.42423e+08	2.05789e+08	2.00228e+08	1.73526e+08	3.56666e+07
M213T387	Dethiobiotin	213.04	387.085	214.132	0.859841	C10H18N2O3	C01909	[M-H]-	BioDeepDB	0.000367861	5.32121e+06	5.12518e+06	7.33326e+06	4.39014e+06	4.50042e+06	4.00956e+06	3.7443e+06	3.73159e+06	4.05592e+06
M391T675	Di-n-octyl phthalate	391.286	675.376	390.277	5.27653	C24H38O4	C14227	[M+H]+	mzCloud	1.98408e-09	1.20751e+07	4.06026e+06	3.91317e+06	3.58457e+07	3.71833e+06	1.31663e+07	1.28661e+07	1.11878e+07	6.66166e+06
M190T330	Diaminopimelic acid	190.106	329.798	190.095	4.75398	C7H14N2O4	C00666	[M]+	BioDeepDB	9.68697e-14	7.76149e+07	6.94614e+07	2.5963e+07	4.90237e+07	4.10375e+07	3.75911e+07	4.38947e+07	2.53811e+07	2.89214e+07
M308T621	Dihydrocapsaicin	308.221	621.252	307.215	3.40596	C18H29NO3	C16952	[M+H]+	BioDeepDB	0.0495556	2.10213e+07	1.30999e+07	2.08175e+07	1.0048e+07	1.06174e+07	1.13301e+07	6.52581e+06	7.03597e+06	9.17442e+06
M321T481	Dihydromyricetin	321.055	481.39	320.053	15.5348	C15H12O8	C02906	[M+H]+	BioDeepDB	4.77191e-06	1.97671e+07	1.77456e+07	1.26168e+07	3.76758e+07	8.43676e+06	2.07991e+07	1.50917e+07	1.19807e+07	2.83037e+07
M113T821	Dihydrouracil	112.984	820.782	114.043	2.16267	C4H6N2O2	C00429	[M-H]-	BioDeepDB	2.2322e-11	9.35534e+06	2.80254e+07	5.48771e+06	1.95407e+07	2.8527e+07	5.69316e+06	2.12978e+07	1.52494e+07	4.48088e+07
M94T558	Dimethyl sulfone	94.0453	558.308	94.0089	1.1785	C2H6O2S	C11142	[M]+	BioDeepDB	0.0131589	5.05949e+07	7.15088e+07	7.45602e+07	4.20475e+07	1.75368e+08	4.69226e+07	2.34458e+08	1.67128e+07	5.53094e+07
M147T368	Dimethylbenzimidazole	147.091	367.862	146.084	0.00191927	C9H10N2	C03114	[M+H]+	BioDeepDB	6.92992e-25	5.03685e+07	4.35923e+07	6.0011e+07	5.97613e+06	2.13617e+07	2.12646e+07	5.21786e+07	4.38457e+07	4.50174e+07
M593T726	Divinylprotochlorophyllide	593.199	725.617	610.207	1.1094	C35H30MgN4O5	C11831	[M+H-H2O]+	MetaDNA	0.0114299	4.67962e+06	631914	4.194e+06	2.53413e+07	2.50686e+07	1.58689e+07	4.63541e+06	2.8387e+06	8.7056e+06
M213T532	Dodecanedioic acid	213.138	532.038	230.152	29.5195	C12H22O4	C02678	[M+H-H2O]+	BioDeepDB	0.133791	1.98299e+07	1.3608e+07	2.81393e+07	6.23219e+06	1.74794e+06	5.65731e+06	9.35395e+06	6.57207e+06	9.44128e+06
M200T36	Dodecanoic acid	199.987	36.2787	200.178	0.0058584	C12H24O2	C02679	[M]+	BioDeepDB	0.000113478	5.19256e+07	3.87717e+07	3.22116e+07	3.28847e+07	2.4287e+07	1.63711e+07	2.2405e+07	1.62161e+07	1.48622e+07
M154T160	Dopamine	154.087	160.339	153.079	2.95621	C8H11NO2	C03758	[M+H]+	BioDeepDB	0.0047422	9.51666e+07	7.40653e+07	3.77654e+07	9.88755e+07	7.23778e+07	6.27514e+07	9.59359e+07	8.20966e+07	1.23831e+08
M291T430	Epicatechin	291.085	430.372	290.079	3.75306	C15H14O6	C09727	[M+H]+	BioDeepDB	4.18117e-27	1.80223e+09	1.35568e+09	2.06977e+09	2.45413e+09	2.11143e+09	1.65581e+09	1.41116e+09	1.23969e+09	1.7387e+09
M457T507	Epigallocatechin gallate	457.077	506.957	458.085	0.938587	C22H18O11	C09731	[M-H]-	BioDeepDB	1.34586e-33	4.55417e+07	4.55167e+07	2.02934e+07	3.84379e+07	1.39822e+08	3.78377e+07	1.15923e+08	5.02612e+07	6.77588e+07
M114T102	Epsilon-caprolactam	114.091	102.164	113.084	2.01965	C6H11NO	C06593	[M+H]+	BioDeepDB	0.00260231	1.72877e+08	1.35428e+08	1.69125e+08	1.80141e+08	1.90285e+08	1.57234e+08	2.59555e+08	2.29746e+08	2.39285e+08
M289T511	Eriodictyol	289.07	511.139	288.063	2.15059	C15H12O6	C05631	[M+H]+	BioDeepDB	0.0978929	4.46467e+07	3.98761e+07	4.69588e+07	8.37571e+07	8.00388e+07	6.43699e+07	4.99549e+07	4.59901e+07	5.71916e+07
M288T499	Eriodictyol chalcone	288.057	498.534	288.063	21.9374	C15H12O6	C15525	[M]+	BioDeepDB	5.43528e-07	4.62711e+07	4.56626e+07	3.1732e+07	2.99385e+07	2.99784e+07	2.94554e+07	3.38227e+07	2.51733e+07	2.72318e+07
M338T839_2	Erucic acid	338.342	839.313	338.318	1.70216	C22H42O2	C08316	[M]+	BioDeepDB	2.19714e-25	1.0501e+08	2.54456e+09	1.57846e+09	3.16725e+09	3.20353e+09	2.44568e+09	1.68318e+09	1.51347e+09	1.63449e+09
M149T789	Estragole	149.096	789.373	148.089	2.73717	C10H12O	C10452	[M+H]+	BioDeepDB	4.59564e-08	2.17142e+07	1.25706e+07	1.6731e+07	2.4023e+07	2.04782e+07	1.53678e+07	1.81666e+07	1.62654e+07	1.89109e+07
M209T830	Ethirimol	209.154	830.408	209.153	0.0317131	C11H19N3O	C18828	[M]+	BioDeepDB	9.22008e-05	2.82593e+07	1.88779e+07	2.00081e+07	2.15674e+07	2.02391e+07	1.86967e+07	5.21415e+07	1.6715e+07	2.04226e+07
M237T583	Farnesoic acid	237.185	583.332	236.178	0.583845	C15H24O2	C16502	[M+H]+	BioDeepDB	0.231466	1.82536e+07	1.31045e+07	1.81375e+07	1.22946e+08	1.16094e+08	7.81107e+07	3.19451e+07	2.56523e+07	3.00636e+07
M232T771	Fenfluramine	232.133	770.714	231.124	2.27594	C12H16F3N	C06996	[M+H]+	BioDeepDB	0.0379769	1.4685e+07	8.08542e+06	1.91997e+07	7.33619e+06	5.33694e+06	7.97036e+06	1.5376e+07	9.07019e+06	1.08497e+07
M274T686	Fisetinidol	274.079	686.089	274.084	17.9756	C15H14O5	C09735	[M]+	MetaDNA	0.0958633	1.36683e+07	1.05004e+07	1.33796e+07	1.34351e+07	1.16033e+07	1.05229e+07	1.4427e+07	1.20224e+07	1.43266e+07
M469T530	Flavonol 3-O-(6-O-malonyl-beta-D-glucoside)	469.112	529.5	486.116	6.239	C24H22O11	C04385	[M+H-H2O]+	BioDeepDB	5.60054e-13	1.663e+07	1.32241e+07	1.77089e+07	2.88646e+07	2.7646e+07	2.17881e+07	1.9331e+07	1.70525e+07	2.11272e+07
M457T501	FMN	457.073	500.899	456.105	6.09703	C17H21N4O9P	C00061	[M+H]+	BioDeepDB	1.45209e-19	1.7089e+07	1.4892e+07	1.65986e+07	3.32715e+07	4.44855e+07	3.04879e+07	1.3031e+07	1.27159e+07	1.56169e+07
M473T598	Folinic acid	473.179	598.217	473.166	4.10561	C20H23N7O7	C03479	[M]+	BioDeepDB	6.0022e-07	4.83214e+06	2.23254e+06	6.1179e+06	2.5145e+07	2.36131e+07	1.5178e+07	8.13479e+06	5.86541e+06	8.68043e+06
M116T530	Fumaric acid	116.107	529.867	116.011	0.0812216	C4H4O4	C00122	[M]+	BioDeepDB	6.55459e-06	6.82456e+07	4.74048e+07	7.62974e+07	3.47191e+07	3.87334e+07	4.19863e+07	2.32483e+07	2.75362e+07	2.86124e+07
M288T753_1	Galantamine	288.158	753.098	287.152	4.61784	C17H21NO3	C08526	[M+H]+	BioDeepDB	1.00602e-08	1.44632e+07	1.08052e+07	1.40634e+07	1.00411e+07	8.81259e+06	9.45402e+06	9.76425e+06	1.16936e+07	6.45312e+06
M169T486	Gallic acid	169.011	485.911	170.022	17.4828	C7H6O5	C01424	[M-H]-	BioDeepDB	2.58559e-09	2.07054e+07	1.91506e+08	2.07703e+08	1.49434e+08	1.11295e+08	2.32124e+08	2.63532e+08	1.09333e+08	3.66776e+08
M104T90	gamma-Aminobutyric acid	104.071	89.5121	103.063	0.00560845	C4H9NO2	C00334	[M+H]+	BioDeepDB	0.000450343	3.72056e+07	2.84877e+07	3.82575e+07	4.04785e+07	2.91717e+07	2.3882e+07	5.6609e+07	4.00678e+07	5.04806e+07
M199T188	gamma-Glutamyl-beta-aminopropiononitrile	199.107	187.745	199.096	2.05683	C8H13N3O3	C06114	[M]+	BioDeepDB	3.73333e-09	2.15333e+07	2.59589e+07	4.44239e+07	1.22557e+07	8.63343e+06	2.3487e+06	1.26192e+07	1.51356e+07	1.43184e+07
M273T576	Garbanzol	273.075	576.071	272.068	3.76689	C15H12O5	C09751	[M+H]+	BioDeepDB	3.00948e-05	3.6299e+07	1.79182e+07	3.30685e+07	5.53973e+07	5.30836e+07	3.90316e+07	4.04619e+07	3.65525e+07	4.56055e+07
M207T742	Genipin	207.066	742.247	226.084	0.598073	C11H14O5	C09780	[M-H2O-H]-	mzCloud	9.95139e-05	5.04824e+06	4.00834e+06	6.35812e+06	5.09538e+06	4.96823e+06	4.46971e+06	4.25957e+06	3.76476e+06	4.02984e+06
M455T633	Gentamicin A2	455.168	632.845	455.212	4.74338	C17H33N3O11	C17701	[M]+	BioDeepDB	1.65377e-12	6.86155e+06	5.26083e+06	8.72551e+06	2.33066e+07	2.28953e+07	1.47472e+07	1.8766e+06	1.44016e+06	1.93092e+06
M153T413	Gentisic acid	153.018	412.659	154.027	11.653	C7H6O4	C00628	[M-H]-	BioDeepDB	4.67677e-12	7.4711e+07	7.34715e+07	9.24009e+07	5.71779e+08	1.53729e+08	1.31145e+08	6.85994e+07	1.05826e+08	9.8773e+07
M314T260	Geranyl diphosphate	314.091	260.38	314.068	0.186835	C10H20O7P2	C00341	[M]+	BioDeepDB	2.74151e-27	4.52025e+08	3.61862e+08	5.75726e+08	3.97449e+08	4.24249e+08	3.56815e+08	6.21604e+08	4.62445e+08	5.7511e+08
M425T449	Ginkgolide B	425.139	448.634	424.137	12.2983	C20H24O10	C07602	[M+H]+	MoNA	1.46552e-05	2.17615e+07	1.56103e+07	1.46195e+07	1.9163e+07	2.47195e+07	2.01722e+07	2.73375e+07	2.84845e+07	2.44118e+07
M195T84	Gluconic acid	195.05	83.8544	196.058	0.00921382	C6H12O7	C00257	[M-H]-	BioDeepDB	3.85795e-05	2.91569e+07	2.8273e+07	3.33503e+07	4.32589e+07	3.72955e+07	3.89513e+07	4.74338e+07	4.66636e+07	5.31874e+07
M177T141	Gluconolactone	177.039	141.132	178.048	6.03476	C6H10O6	C00198	[M-H]-	BioDeepDB	0.000192033	7.41466e+07	4.9009e+07	9.74973e+07	5.46894e+07	7.50955e+07	1.20489e+07	1.73425e+07	1.00319e+08	8.16715e+07
M162T88	Glucosamine	162.075	87.872	179.079	21.4548	C6H13NO5	C00329	[M+H-H2O]+	MoNA	0.00590699	1.90094e+07	1.51551e+07	2.13024e+07	9.28839e+07	7.31687e+07	6.60721e+07	7.08961e+07	6.14215e+07	7.20838e+07
M132T280	Glutaric acid	131.974	280.13	132.042	1.41446	C5H8O4	C00489	[M]+	BioDeepDB	6.25166e-07	2.64797e+07	1.58966e+08	1.14908e+07	1.11443e+07	1.40123e+08	2.07161e+07	2.49151e+07	7.84945e+06	7.37355e+06
M218T648	Glutethimide	218.117	648.462	217.11	2.2313	C13H15NO2	C07489	[M+H]+	mzCloud	3.75768e-05	3.22014e+07	2.18702e+07	2.37915e+07	7.4252e+06	7.33779e+06	2.89303e+06	2.01505e+07	1.81683e+07	1.37639e+07
M89T169	Glyceraldehyde	89.0226	168.57	90.0317	20.6987	C3H6O3	C02154	[M-H]-	GNPS	0.000445384	2.14272e+08	2.20826e+08	2.9246e+07	4.24323e+07	2.94618e+08	3.51422e+08	1.44368e+08	8.08349e+07	2.57807e+08
M105T85	Glyceric acid	105.018	84.8577	106.027	1.4543	C3H6O4	C00258	[M-H]-	BioDeepDB	5.23911e-07	8.82757e+07	9.0852e+07	1.12193e+08	5.99661e+07	5.76319e+07	6.23382e+07	7.96074e+07	7.77456e+07	8.21754e+07
M471T789	Glycyrrhetinate	471.348	788.832	470.34	1.62669	C30H46O4	C02283	[M+H]+	mzCloud	1.83685e-12	4.05942e+07	3.25017e+07	1.6535e+07	4.55152e+07	1.69053e+07	1.48176e+07	4.02085e+07	1.69937e+07	1.51575e+07
M344T211	GMP	344.039	211.397	363.058	1.14665	C10H14N5O8P	C00144	[M-H2O-H]-	MetaDNA	0.000322145	1.93052e+07	1.80654e+07	2.35242e+07	1.24886e+07	1.62015e+07	1.6493e+07	2.31311e+07	1.97865e+07	1.74814e+07
M175T167	Guanidinosuccinic acid	175.06	166.565	175.059	5.49594	C5H9N3O4	C03139	[M]-	BioDeepDB	8.08339e-22	4.01252e+07	3.04281e+07	4.7428e+07	7.70549e+07	6.21612e+07	4.63136e+07	4.89407e+07	4.54355e+07	1.11821e+08
M152T102_1	Guanine	152.056	101.806	151.049	4.62081	C5H5N5O	C00242	[M+H]+	BioDeepDB	1.05909e-24	1.50951e+08	1.34876e+08	1.28303e+08	7.30357e+07	6.65962e+07	7.61887e+07	4.09175e+07	3.94117e+07	4.4335e+07
M284T107	Guanosine	284.098	106.524	283.092	2.87262	C10H13N5O5	C00387	[M+H]+	BioDeepDB	4.05654e-17	2.98221e+07	2.96676e+07	2.53738e+07	1.83354e+07	1.79049e+07	1.685e+07	1.96689e+07	1.68285e+07	1.6984e+07
M346T240	Guanosine 2,3-cyclic phosphate	346.055	240.47	345.047	0.215364	C10H12N5O7P	C06194	[M+H]+	BioDeepDB	3.92273e-14	6.88195e+07	1.09318e+08	1.23696e+08	4.65344e+07	7.17257e+07	4.45203e+07	9.79502e+07	3.21094e+07	5.03133e+07
M183T483_2	Harman	183.091	482.957	182.084	1.6719	C12H10N2	C09209	[M+H]+	MoNA	1.81457e-07	9.88032e+07	7.10374e+07	9.5085e+07	3.58047e+07	3.66589e+07	3.70226e+07	2.51218e+07	2.41146e+07	3.26902e+07
M213T485	Harmine	213.101	484.692	212.095	2.72833	C13H12N2O	C06538	[M+H]+	BioDeepDB	0.000122774	4.67015e+07	3.41763e+07	5.06325e+07	3.03481e+07	2.59065e+07	2.75504e+07	2.81129e+07	2.72966e+07	3.49323e+07
M112T200	Histamine	112.087	199.885	111.08	0.593757	C5H9N3	C00388	[M+H]+	BioDeepDB	0.000550476	5.43341e+07	4.09394e+07	7.46064e+07	1.49786e+07	9.78512e+06	9.84437e+06	3.40082e+07	2.55096e+07	4.51429e+07
M188T322	Homo-L-arginine	188.128	322.197	188.127	1.7999	C7H16N4O2	C01924	[M]+	MoNA	0.0298292	1.00768e+07	7.70894e+06	1.13906e+07	1.67377e+07	1.32559e+07	9.91397e+06	2.79721e+07	2.28379e+07	2.97397e+07
M206T430	Homocitric acid	206.046	430.372	206.043	17.0328	C7H10O7	C01251	[M]+	BioDeepDB	0.200336	2.06627e+07	1.87935e+07	2.00716e+07	1.98216e+07	1.85706e+07	1.53799e+07	1.48744e+07	1.31382e+07	1.33938e+07
M167T499	Homogentisate	167.033	498.942	168.042	9.977	C8H8O4	C00544	[M-H]-	mzCloud	5.6912e-07	4.33784e+07	4.04551e+07	6.19798e+07	8.34798e+07	3.71495e+07	3.02804e+07	4.35644e+07	4.50295e+07	5.57077e+07
M110T34	Hydroquinone	110.02	34.1244	110.037	4.88881	C6H6O2	C00530	[M]+	BioDeepDB	4.08752e-05	5.9443e+08	4.7706e+08	2.99564e+08	2.65129e+08	2.32792e+08	1.64059e+08	1.2423e+08	1.43433e+08	1.20682e+08
M224T73	Hydroxykynurenine	223.988	73.2437	224.08	1.73892	C10H12N2O4	C02794	[M]+	BioDeepDB	2.79035e-05	7.91893e+07	6.35383e+07	7.53634e+07	8.93732e+07	5.97752e+07	6.80195e+07	6.26609e+07	5.67763e+07	7.53893e+07
M183T202	Hydroxyphenyllactic acid	183.041	202.007	182.058	29.5441	C9H10O4	C03672	[M+H]+	BioDeepDB	0.0478808	3.32417e+07	3.41493e+07	3.02509e+07	2.62743e+07	2.68665e+07	2.23546e+07	2.13008e+07	2.2101e+07	2.09505e+07
M118T735	Indole	118.065	734.553	117.058	2.23614	C8H7N	C00463	[M+H]+	BioDeepDB	2.31038e-09	1.43074e+07	1.26542e+07	1.69742e+07	3.83381e+06	1.22312e+07	1.90173e+07	1.65609e+07	1.27184e+07	2.9858e+07
M176T427	Indole-3-acetate	176.07	427.149	175.063	1.70226	C10H9NO2	C00954	[M+H]+	mzCloud	5.97929e-05	5.80688e+07	4.64133e+07	6.95911e+07	3.00755e+07	2.49974e+07	2.19379e+07	2.53007e+07	2.11254e+07	2.73155e+07
M158T607	Indoleacetaldehyde	158.06	607.273	159.068	6.72387	C10H9NO	C00637	[M-H]-	MoNA	8.48477e-08	1.39393e+07	9.8163e+06	1.60215e+07	4.28083e+06	4.80682e+06	3.92455e+06	6.74063e+06	6.76207e+06	8.04087e+06
M186T532	Indolebutyric acid	186.091	531.811	203.095	19.3663	C12H13NO2	C11284	[M+H-H2O]+	mzCloud	0.000241323	2.20116e+07	1.63147e+07	2.67119e+07	1.48963e+07	1.23752e+07	1.25731e+07	1.51716e+07	1.44651e+07	1.67955e+07
M188T600	Indolelactic acid	188.07	599.882	205.074	19.7025	C11H11NO3	C02043	[M+H-H2O]+	BioDeepDB	0.247319	2.14603e+07	1.27836e+07	3.14657e+07	1.77743e+07	1.32925e+07	1.39656e+07	2.66335e+07	2.18721e+07	2.96294e+07
M267T303	Inosine	267.075	302.827	268.081	4.4866	C10H12N4O5	C00294	[M-H]-	BioDeepDB	6.13872e-07	8.62607e+06	6.83909e+06	1.06171e+07	1.13623e+07	1.50939e+07	1.05958e+07	1.04828e+07	1.11629e+07	1.13433e+07
M233T530	Isoalantolactone	233.153	530.093	232.146	0.0422085	C15H20O2	C09484	[M+H]+	BioDeepDB	8.75308e-06	1.33699e+07	9.83167e+06	1.47484e+07	1.68049e+07	1.38199e+07	1.13577e+07	2.40824e+07	3.10202e+07	3.04953e+07
M134T91	Isochavicol	134.081	90.8903	134.073	2.29081	C9H10O	C20464	[M]+	BioDeepDB	3.06524e-06	7.01718e+07	4.4013e+07	7.70437e+07	6.41917e+07	6.21437e+07	9.07261e+07	1.22262e+08	9.78924e+07	1.23295e+08
M209T451	Isoelemicin	209.117	450.871	208.11	1.16833	C12H16O3	C16975	[M+H]+	BioDeepDB	3.1069e-15	2.9362e+07	2.07774e+07	2.63605e+07	8.26271e+07	8.26759e+07	6.40891e+07	3.70571e+07	3.31269e+07	5.24115e+07
M139T718	Isophorone	139.112	718.103	138.105	0.815193	C9H14O	C14743	[M+H]+	MoNA	8.50216e-06	3.11041e+07	2.44096e+07	2.81594e+07	2.31162e+07	2.68155e+07	1.96773e+07	2.06863e+07	2.20056e+07	2.33731e+07
M168T104	Isopyridoxal	168.065	104.157	167.058	1.85014	C8H9NO3	C06051	[M+H]+	BioDeepDB	0.0161003	7.50015e+07	6.2057e+07	1.34429e+08	4.72609e+07	4.04249e+07	5.37286e+07	5.83089e+07	2.85357e+07	4.52021e+07
M317T636	Isorhamnetin	317.065	636.261	316.058	3.0673	C16H12O7	C10084	[M+H]+	BioDeepDB	1.51676e-09	2.35193e+07	1.51943e+07	2.67911e+07	1.81533e+07	1.72998e+07	1.59546e+07	1.84787e+07	1.7237e+07	2.04969e+07
M433T489	Isovitexin	433.111	488.835	432.106	5.01354	C21H20O10	C01714	[M+H]+	BioDeepDB	1.85829e-15	2.49388e+07	1.85878e+07	2.48017e+07	3.50808e+07	3.324e+07	2.84914e+07	2.60188e+07	2.37256e+07	2.54488e+07
M593T277_2	Isowertin 2-rhamnoside	593.131	276.824	592.179	2.44482	C28H32O14	C12629	[M+H]+	BioDeepDB	8.51837e-26	4.99652e+07	2.84928e+07	3.16462e+07	2.59417e+07	6.05983e+07	3.51983e+07	5.03439e+07	4.68776e+07	5.7212e+07
M165T722	Jasmone	165.127	722.312	164.12	1.96517	C11H16O	C08490	[M+H]+	mzCloud	0.0435534	1.45084e+07	1.41935e+07	3.1922e+06	1.31082e+07	1.32051e+07	1.0157e+07	1.7812e+07	1.68456e+07	2.97924e+07
M209T561	Jasmonic acid	209.117	560.628	210.126	7.16815	C12H18O3	C08491	[M-H]-	BioDeepDB	4.36804e-13	1.21874e+08	8.10235e+07	1.81401e+08	1.3143e+08	1.40761e+08	1.04829e+08	1.70809e+08	1.42244e+08	1.86908e+08
M287T670	Kaempferol	287.05	669.726	286.048	15.6092	C15H10O6	C05903	[M+H]+	BioDeepDB	2.48242e-10	1.88051e+07	1.09218e+07	3.04652e+07	1.35004e+07	4.84715e+07	1.43611e+07	3.31962e+07	2.64949e+07	8.2678e+06
M113T436_1	Ketoleucine	113.06	435.691	130.063	0.122097	C6H10O3	C00233	[M+H-H2O]+	BioDeepDB	1.05404e-05	7.67483e+07	3.91374e+07	7.65088e+07	4.92793e+07	5.03365e+07	4.39521e+07	3.93854e+07	3.60086e+07	4.50251e+07
M216T433	Kinetin	216.087	432.742	215.081	3.57904	C10H9N5O	C08272	[M+H]+	BioDeepDB	5.66439e-28	2.48749e+08	1.73681e+08	2.48265e+08	1.34562e+08	1.24152e+08	1.1308e+08	4.61143e+07	4.20374e+07	6.57863e+07
M190T649	Kynurenic acid	190.086	648.733	189.043	3.01237	C10H7NO3	C01717	[M+H]+	BioDeepDB	4.42963e-07	2.05381e+07	1.44209e+07	2.57431e+07	1.89168e+07	1.64554e+07	1.22525e+07	2.10512e+07	2.07138e+07	1.99051e+07
M118T762	L-2,4-diaminobutyric acid	118.066	761.905	118.074	0.142116	C4H10N2O2	C03283	[M]+	BioDeepDB	0.00033819	3.2478e+07	2.13518e+07	4.73831e+07	2.36101e+07	2.28785e+07	2.50377e+07	3.13786e+07	2.95662e+07	3.72975e+07
M168T287	L-4-Hydroxyphenylglycine	168.064	286.938	167.058	7.46803	C8H9NO3	C12323	[M+H]+	BioDeepDB	2.39487e-05	5.43e+06	4.85241e+06	2.87182e+07	2.21606e+07	2.13005e+07	3.3108e+06	2.04489e+07	1.40274e+07	4.3462e+06
M175T85	L-Arginine	175.119	84.7321	174.112	2.42514	C6H14N4O2	C00062	[M+H]+	BioDeepDB	1.40344e-29	1.11763e+07	8.92741e+06	1.44248e+07	3.71643e+06	3.56167e+06	3.20708e+06	2.18797e+07	2.55359e+07	3.23707e+07
M133T793	L-Asparagine	133.101	792.932	132.054	1.52673	C4H8N2O3	C00152	[M+H]+	BioDeepDB	0.00209938	4.36697e+07	1.15247e+07	2.02413e+07	1.62431e+07	6.38365e+07	3.29349e+06	1.92305e+07	2.30002e+07	2.91447e+07
M134T89	L-Aspartic acid	134.045	88.5029	133.037	0.0962218	C4H7NO4	C00049	[M+H]+	BioDeepDB	1.9715e-17	4.34707e+07	4.60341e+07	4.22172e+07	6.55897e+07	7.12732e+07	6.96763e+07	6.83095e+07	5.93631e+07	5.41412e+07
M166T558	L-beta-Phenylalanine	166.086	557.718	165.079	4.31795	C9H11NO2	C20487	[M+H]+	MetaDNA	0.0310225	2.42087e+07	1.81371e+07	3.00404e+07	5.2468e+07	1.4576e+07	3.61272e+06	2.83653e+07	1.41759e+07	1.84986e+07
M121T66	L-Cysteine	120.981	66.2882	121.02	2.28734	C3H7NO2S	C00097	[M]+	BioDeepDB	1.84119e-09	2.90005e+07	3.76571e+07	8.66827e+06	3.62216e+07	7.9102e+06	4.05078e+07	3.21139e+07	3.22872e+07	3.43044e+07
M239T585	L-Cystine	239.128	584.659	240.024	2.39416	C6H12N2O4S2	C00491	[M-H]-	BioDeepDB	9.30412e-08	1.25784e+07	7.09937e+06	1.87855e+07	7.48575e+06	6.75053e+06	6.94925e+06	9.15726e+06	7.94118e+06	1.13103e+07
M196T375	L-Dopa	196.061	374.673	197.069	3.53679	C9H11NO4	C00355	[M-H]-	mzCloud	3.05641e-05	5.979e+07	3.47352e+07	7.0883e+07	2.76804e+07	3.5325e+07	2.87169e+07	3.57318e+07	3.42981e+07	4.76287e+07
M164T147	L-Fucose	164.091	146.515	164.069	2.14596	C6H12O5	C00507	[M]+	BioDeepDB	0.15381	2.19219e+07	1.56879e+07	2.70067e+07	8.82631e+06	7.61261e+06	7.3178e+06	1.41199e+07	1.1752e+07	1.49992e+07
M128T247	L-Glutamic acid	128.035	247.447	147.053	0.966392	C5H9NO4	C00025	[M-H2O-H]-	BioDeepDB	1.07514e-08	1.36268e+07	1.7166e+07	1.08703e+08	1.30715e+08	2.76707e+07	5.6709e+07	3.29294e+07	3.09417e+08	1.88376e+07
M147T88	L-Glutamine	147.076	88.2109	146.069	2.48918	C5H10N2O3	C00064	[M+H]+	MetaDNA	0.000161132	3.11265e+07	2.25455e+07	3.22657e+07	4.68135e+07	5.3643e+07	4.1626e+07	4.36184e+07	2.74242e+07	3.94822e+07
M138T669	L-Histidine	138.065	668.799	155.07	21.5479	C6H9N3O2	C00135	[M+H-H2O]+	MetaDNA	0.0864107	2.73757e+07	6.87528e+06	5.1576e+07	3.64689e+07	7.71458e+07	3.36869e+07	2.86142e+07	1.16903e+07	1.2348e+08
M141T499	L-Histidinol	141.091	499.136	141.09	2.36653	C6H11N3O	C00860	[M]+	BioDeepDB	7.6037e-05	3.04922e+07	2.37696e+07	3.40924e+07	3.29175e+07	6.00778e+07	2.00331e+07	2.00535e+07	2.69747e+07	2.3049e+07
M180T427	L-Homophenylalanine	180.102	426.872	179.095	0.520569	C10H13NO2	C17235	[M+H]+	BioDeepDB	4.10961e-23	1.82349e+08	1.26683e+08	2.39351e+08	2.81971e+08	2.11709e+08	2.03858e+08	1.82713e+08	1.68191e+08	1.89575e+08
M183T92	L-Iditol	183.086	92.1028	182.079	1.00758	C6H14O6	C01507	[M+H]+	mzCloud	1.37553e-09	3.03649e+07	2.50093e+07	2.60094e+07	2.75118e+07	2.14599e+07	1.82281e+07	1.94086e+07	1.81633e+07	1.78843e+07
M132T221	L-Isoleucine	132.064	220.576	131.095	13.8749	C6H13NO2	C00407	[M+H]+	BioDeepDB	1.86948e-12	6.17236e+07	5.53596e+07	5.50317e+07	683088	1.79306e+08	1.36175e+08	5.77927e+07	1.67265e+07	3.79863e+07
M208T590	L-Kynurenine	208.133	590.462	208.085	1.31375	C10H12N2O3	C00328	[M]+	BioDeepDB	0.0016472	1.10836e+07	8.96694e+06	1.37465e+07	2.16785e+07	2.1926e+07	1.57984e+07	1.65607e+07	1.30288e+07	1.6659e+07
M90T89	L-Lactic acid	90.0553	88.5029	90.0317	0.966871	C3H6O3	C00186	[M]+	BioDeepDB	2.08492e-05	6.65984e+07	4.40822e+07	5.981e+07	5.95833e+07	5.96315e+07	4.31097e+07	9.85996e+07	8.3148e+07	9.79323e+07
M129T146	L-Lysine	129.102	146.364	146.106	29.1973	C6H14N2O2	C00047	[M+H-H2O]+	BioDeepDB	6.31977e-08	3.98377e+07	2.76321e+07	4.29085e+07	6.10326e+07	6.40144e+07	4.49049e+07	8.86109e+07	6.64807e+07	7.79803e+07
M133T105	L-Malic acid	133.013	105.278	134.022	5.82838	C4H6O5	C00149	[M-H]-	BioDeepDB	4.31501e-05	8.31391e+07	6.60907e+07	8.26315e+07	7.92903e+07	9.09143e+07	8.19973e+07	7.82359e+07	8.58779e+07	7.24507e+07
M166T437	L-Phenylalanine	166.086	436.789	165.079	2.69904	C9H11NO2	C00079	[M+H]+	BioDeepDB	0.00103118	1.85629e+07	1.53369e+07	1.88325e+07	1.51141e+07	1.28917e+07	1.30304e+07	1.4927e+07	1.13404e+07	1.70765e+07
M116T147	L-Proline	116.07	146.515	115.063	3.26993	C5H9NO2	C00148	[M+H]+	BioDeepDB	9.3289e-05	4.33756e+07	3.02013e+07	4.09291e+07	3.09998e+07	3.05204e+07	3.01837e+07	2.6106e+07	1.9945e+07	2.74251e+07
M164T660	L-Rhamnofuranose	164.066	660.334	164.069	7.01683	C6H12O5	C02431	[M]+	BioDeepDB	1.26572e-06	4.97959e+07	2.51428e+07	4.97337e+07	2.37727e+07	9.61249e+06	2.31768e+07	9.14632e+06	3.59314e+07	2.97243e+07
M188T305	L-Targinine	188.128	305.338	188.127	2.3508	C7H16N4O2	C03884	[M]+	BioDeepDB	0.148597	1.3123e+07	9.57442e+06	1.48057e+07	2.68024e+07	1.79024e+07	1.59243e+07	3.52592e+07	2.97703e+07	3.65401e+07
M173T121	L-Theanine	173.091	120.785	174.1	11.2137	C7H14N2O3	C01047	[M-H]-	BioDeepDB	5.63655e-08	1.78199e+08	1.15188e+08	2.36687e+08	7.90294e+06	3.9343e+08	2.71138e+08	5.50934e+08	4.6678e+08	4.28864e+08
M120T89	L-Threonine	120.065	89.4646	119.058	0.551146	C4H9NO3	C00188	[M+H]+	BioDeepDB	8.72035e-35	8.08659e+07	5.42187e+07	8.24085e+07	8.8249e+07	8.72374e+07	7.23548e+07	1.20873e+08	9.09608e+07	1.13297e+08
M205T399_2	L-Tryptophan	205.097	398.549	204.09	3.29516	C11H12N2O2	C00078	[M+H]+	BioDeepDB	0.000100219	8.75051e+08	5.98004e+08	8.83778e+08	1.41578e+09	1.51291e+09	1.20783e+09	1.49633e+09	1.12821e+09	1.45574e+09
M182T212	L-Tyrosine	182.08	212.16	181.074	5.24364	C9H11NO3	C00082	[M+H]+	BioDeepDB	8.59006e-15	7.38969e+08	4.71823e+08	6.7901e+08	6.86522e+08	6.78215e+08	5.58261e+08	1.3919e+09	1.00212e+09	1.37616e+09
M118T105	L-Valine	118.086	104.81	117.079	1.17435	C5H11NO2	C00183	[M+H]+	BioDeepDB	2.50636e-21	3.1663e+08	2.19776e+08	3.24678e+08	3.60822e+08	3.38013e+08	2.73902e+08	3.86456e+08	3.0281e+08	3.81183e+08
M361T614	Lariciresinol	361.163	613.502	360.157	3.67178	C20H24O6	C10646	[M+H]+	BioDeepDB	0.0170234	1.27097e+07	6.18463e+06	1.06272e+07	2.56408e+07	2.17744e+07	1.82987e+07	1.70193e+07	1.54079e+07	1.77759e+07
M306T337	Leucocyanidin	306.096	337.075	306.074	3.37163	C15H14O7	C05906	[M-H2O+NH4]+	BioDeepDB	2.15634e-06	9.49402e+07	9.64148e+07	1.44982e+08	2.26666e+08	2.64717e+08	1.73631e+08	1.75567e+08	1.29753e+08	5.0222e+07
M305T410_2	Leucodelphinidin	305.065	409.529	322.069	11.3966	C15H14O8	C05909	[M+H-H2O]+	BioDeepDB	0.000158099	7.5021e+07	5.87217e+07	4.90892e+07	3.83758e+07	7.19353e+07	7.28753e+07	3.09191e+07	5.72821e+07	2.76617e+07
M291T533	Leucopelargonidin	291.094	532.996	290.079	26.3358	C15H14O6	C03648	[M+H]+	BioDeepDB	5.60094e-06	9.39443e+06	8.36551e+06	3.12272e+06	1.36765e+07	1.70993e+07	1.32502e+07	4.83908e+07	7.05342e+06	4.82448e+07
M263T836_2	Linoleic acid	263.236	835.767	280.24	12.1391	C18H32O2	C01595	[M+H-H2O]+	BioDeepDB	5.36177e-13	2.72597e+07	1.92106e+07	2.89597e+07	1.68426e+07	1.34932e+07	1.25986e+07	1.7445e+07	1.66419e+07	1.68334e+07
M376T824	Lithocholic acid	376.311	823.965	376.298	2.47911	C24H40O3	C03990	[M]+	BioDeepDB	1.62223e-18	1.29805e+08	1.03237e+08	9.54072e+07	9.80556e+07	7.80718e+07	9.33497e+07	9.07443e+07	6.04576e+07	7.77648e+07
M285T571	Luteolin	285.04	571.289	286.048	1.94371	C15H10O6	C01514	[M-H]-	BioDeepDB	1.44316e-08	2.81703e+07	1.3615e+07	1.74969e+07	5.60031e+07	2.67791e+07	3.813e+07	1.50368e+07	2.71755e+07	2.99523e+07
M409T822	LysoPA(16:0/0:0)	409.235	821.757	410.243	3.28942	C19H39O7P	C04036	[M-H]-	BioDeepDB	2.78264e-14	1.9406e+07	1.73938e+07	2.80702e+07	2.13355e+07	1.983e+07	1.78547e+07	1.649e+07	1.71326e+07	1.79363e+07
M165T423	m-Coumaric acid	165.054	423.482	164.047	2.60522	C9H8O3	C12621	[M+H]+	BioDeepDB	1.11265e-12	6.88972e+07	5.15226e+07	5.76226e+07	9.17857e+07	9.55828e+07	7.71803e+07	6.86107e+07	7.39525e+07	8.3612e+07
M109T762_2	m-Cresol	109.101	761.905	108.058	4.44795	C7H8O	C01467	[M+H]+	BioDeepDB	0.000400172	2.38531e+07	1.22131e+07	3.58905e+07	1.6939e+07	1.25222e+07	1.1094e+07	1.98785e+07	1.72336e+07	2.46884e+07
M115T93	Maleamate	115.002	92.6003	115.027	2.04099	C4H5NO3	C01596	[M]-	BioDeepDB	2.05149e-27	1.40724e+08	3.58592e+07	1.44619e+08	2.35196e+07	3.99383e+07	2.77978e+07	2.35133e+07	2.01217e+07	2.77238e+07
M99T63	Maleic acid	98.5119	63.2581	116.011	5.65248	C4H4O4	C01384	[M+H-H2O]+	BioDeepDB	4.8058e-06	1.05793e+08	3.57094e+08	2.862e+08	2.19298e+08	1.79781e+08	1.43343e+08	1.54714e+08	1.39952e+08	1.10065e+08
M98T36	Maleimide	97.9916	35.6207	97.0164	1.55072	C4H3NO2	C07272	[M+H]+	BioDeepDB	0.00134265	2.1673e+08	2.09548e+08	1.77039e+08	1.69856e+08	2.10589e+08	1.95709e+08	2.0084e+08	1.93916e+08	1.79387e+08
M125T278	Maltol	125.023	278.265	126.032	12.0228	C6H6O3	C11918	[M-H]-	MoNA	0.000248587	4.77801e+06	1.61001e+07	7.35883e+06	7.79658e+06	1.15559e+07	1.61532e+07	9.09156e+07	9.34289e+07	3.76448e+07
M493T551_1	Malvidin 3-glucoside	493.131	551.19	493.135	5.54922	C23H25O12	C12140	[M+H]+	BioDeepDB	1.02672e-23	5.23696e+07	3.29575e+07	6.16693e+07	5.49203e+07	4.7643e+07	3.68329e+07	4.13795e+07	3.01233e+07	4.42208e+07
M153T532	Mandelic acid	153.054	532.237	152.047	1.60391	C8H8O3	C01984	[M+H]+	BioDeepDB	0.00869533	2.60084e+07	1.77981e+07	2.18533e+07	1.29281e+07	1.61506e+07	1.36678e+07	1.33315e+07	1.83913e+07	1.1976e+07
M183T284	Mannitol	182.985	283.874	182.079	0.383824	C6H14O6	C00392	[M+H]+	BioDeepDB	4.26838e-15	2.60233e+08	1.91294e+08	1.34803e+08	1.84215e+08	3.5599e+07	9.86007e+07	2.83706e+07	8.28935e+07	1.26714e+08
M259T626	Mannose 6-phosphate	259.024	626.1	260.03	7.86114	C6H13O9P	C00275	[M-H]-	BioDeepDB	3.99296e-07	2.11534e+07	1.64254e+07	2.08722e+07	9.83302e+06	1.04467e+07	1.14967e+07	9.62197e+06	9.39797e+06	1.38523e+07
M455T768	Maslinic acid	455.352	768.357	472.355	0.0257443	C30H48O4	C16939	[M+H-H2O]+	BioDeepDB	6.81628e-05	1.58252e+07	1.10008e+07	2.87242e+07	4.15887e+06	1.10161e+07	3.15661e+06	1.4919e+07	3.53314e+06	4.31959e+06
M129T81	Mesaconate	129.018	81.271	130.027	13.3879	C5H6O4	C01732	[M-H]-	mzCloud	1.27498e-07	3.25502e+07	1.17234e+07	3.84994e+07	3.75141e+07	3.20226e+07	2.95426e+07	3.30029e+07	4.74604e+07	1.25368e+07
M190T101_1	meso-2,6-Diaminoheptanedioate	190.106	100.757	190.095	5.07467	C7H14N2O4	C00680	[M]+	BioDeepDB	0.344475	2.01297e+08	1.60708e+08	2.23964e+08	4.61721e+07	1.50437e+08	1.7031e+08	1.30122e+08	1.16499e+08	1.54762e+08
M190T407	Methyl (indol-3-yl)acetate	190.086	407.215	189.079	2.79641	C11H11NO2	C20635	[M+H]+	mzCloud	5.0568e-05	2.91687e+07	1.77405e+07	5.02695e+07	8.23984e+06	6.92154e+06	6.10166e+06	6.33971e+06	8.97705e+06	1.33006e+07
M153T484	Methyl 2-hydroxybenzoate	153.054	483.694	152.047	2.21025	C8H8O3	C12305	[M+H]+	BioDeepDB	6.3527e-07	1.27624e+07	9.96347e+06	1.37115e+07	2.46394e+07	2.54679e+07	1.98138e+07	1.1808e+07	1.00488e+07	9.99777e+06
M163T536	Methyl cinnamate	163.076	536.306	162.068	1.86055	C10H10O2	C06358	[M+H]+	BioDeepDB	0.000104563	2.72622e+07	2.52938e+07	2.70337e+07	4.72799e+07	3.98224e+07	6.64525e+07	3.21876e+07	2.69936e+07	3.35216e+07
M224T726	Methyl jasmonate	224.127	725.888	224.141	9.70188	C13H20O3	C11512	[M]+	BioDeepDB	0.000433486	1.15259e+07	6.07039e+06	1.50472e+07	3.11152e+06	3.87785e+06	3.44685e+06	6.29307e+06	4.57965e+06	9.77231e+06
M179T711	Methylisoeugenol	179.106	710.961	178.099	0.0192557	C11H14O2	C10478	[M+H]+	BioDeepDB	0.000623833	1.4872e+07	9.54606e+06	1.32179e+07	1.0221e+07	1.08119e+07	9.23533e+06	2.62869e+07	1.11174e+07	1.31647e+07
M469T345	Mycothiol	469.131	344.587	486.152	27.8752	C17H30N2O12S	C06717	[M+H-H2O]+	BioDeepDB	3.22114e-08	2.33625e+07	2.12169e+07	2.99727e+07	6.03773e+07	5.30267e+07	4.29956e+07	3.16019e+07	2.67118e+07	3.32527e+07
M161T93	myo-Inositol	161.046	93.4921	180.063	4.81517	C6H12O6	C00137	[M-H2O-H]-	BioDeepDB	2.73583e-10	2.81387e+07	7.37991e+07	2.28858e+07	1.1521e+08	8.3163e+07	7.28086e+07	2.35671e+07	8.76763e+07	2.85849e+07
M317T371	Myricetin	317.029	371.051	318.038	2.72953	C15H10O8	C10107	[M-H]-	MoNA	0.608812	1.76724e+07	1.78272e+07	2.26756e+07	3.269e+07	3.40309e+07	2.87603e+07	1.52354e+07	1.40225e+07	2.44504e+07
M152T362	N-(Acetyloxy)benzenamine	152.07	361.832	151.063	1.83082	C8H9NO2	C02709	[M+H]+	MetaDNA	0.0141439	3.9987e+07	2.8831e+07	3.48215e+07	2.77308e+07	7.22647e+07	2.34307e+07	3.81479e+07	3.11784e+07	4.02896e+07
M310T94	N-Acetyl-a-neuraminic acid	310.112	94.3185	309.106	0.542168	C11H19NO9	C19909	[M+H]+	BioDeepDB	0.141971	1.30758e+07	1.12545e+07	1.48312e+07	6.62383e+07	4.33785e+07	3.23918e+07	4.83732e+07	3.89658e+07	4.54958e+07
M204T93	N-Acetyl-D-glucosamine	204.087	93.3939	221.09	22.4814	C8H15NO6	C00140	[M+H-H2O]+	BioDeepDB	0.0816508	7.2154e+07	7.52453e+07	6.77803e+07	1.49952e+08	1.41434e+08	1.23471e+08	1.19455e+08	1.05946e+08	9.3405e+07
M208T686	N-Acetyl-D-phenylalanine	208.096	686.089	207.089	1.41983	C11H13NO3	C05620	[M+H]+	MetaDNA	0.0230139	1.15506e+07	1.0253e+07	1.56054e+07	6.30367e+06	5.56532e+06	4.60797e+06	3.37795e+07	1.20193e+07	1.29384e+07
M174T332	N-Acetyl-L-glutamate 5-semialdehyde	174.076	332.149	173.069	1.92667	C7H11NO4	C01250	[M+H]+	BioDeepDB	0.162474	2.64509e+07	2.01758e+07	3.11916e+07	3.24191e+07	3.16369e+07	3.07085e+07	1.31753e+07	1.21287e+07	2.04906e+07
M208T533	N-Acetyl-L-phenylalanine	208.097	532.843	207.089	0.304542	C11H13NO3	C03519	[M+H]+	BioDeepDB	8.61572e-05	4.71223e+07	3.42269e+07	5.30285e+07	2.5854e+07	2.35879e+07	2.32012e+07	3.5401e+07	2.1011e+07	2.61109e+07
M579T521	N-Acetyl-O-demethylpuromycin-5-phosphate	579.17	520.961	579.184	1.30057	C23H30N7O9P	C07030	[M]+	BioDeepDB	7.58518e-07	4.43304e+07	3.36788e+07	4.9436e+07	3.74541e+07	3.27084e+07	3.25845e+07	2.23993e+07	2.3211e+07	2.87964e+07
M285T767	N-Acetylaspartylglutamate	285.064	767.075	304.091	28.983	C11H16N2O8	C12270	[M-H2O-H]-	mzCloud	0.0426284	2.85814e+06	1.858e+06	3.36424e+06	1.8223e+06	3.52792e+06	1.56708e+06	3.82871e+06	4.68926e+06	3.55249e+06
M190T568	N-Acetylglutamic acid	190.086	567.719	189.064	19.75	C7H11NO5	C00624	[M+H]+	BioDeepDB	0.0141154	8.09103e+07	2.32997e+07	2.07571e+07	1.97673e+06	6.98416e+06	5.75162e+06	1.97875e+06	1.75682e+06	2.13781e+06
M172T356	N-Acetylleucine	172.097	356.478	173.105	1.95812	C8H15NO3	C02710	[M-H]-	BioDeepDB	0.00136323	2.3162e+07	1.81635e+07	2.58321e+07	3.8086e+06	1.4506e+07	1.50761e+07	1.88251e+07	1.93001e+07	2.4689e+07
M131T102_2	N-Acetylputrescine	131.118	102.164	130.111	3.30984	C6H14N2O	C02714	[M+H]+	BioDeepDB	8.53783e-07	1.50889e+08	1.09493e+08	1.41217e+08	1.46802e+08	1.54412e+08	1.25359e+08	2.00024e+08	1.69802e+08	1.90954e+08
M218T571	N-Acetylserotonin	218.211	571.347	218.106	1.18447	C12H14N2O2	C00978	[M]+	BioDeepDB	0.00148316	1.4478e+07	6.61361e+06	7.90905e+06	1.42374e+07	1.19336e+07	8.63958e+06	5.9462e+06	7.48987e+06	8.17033e+06
M171T104	N-Alpha-acetyllysine	171.112	103.697	188.116	21.0418	C8H16N2O3	C12989	[M+H-H2O]+	BioDeepDB	0.186391	1.06303e+08	7.37719e+07	1.26707e+08	4.51618e+07	4.48658e+07	4.11191e+07	5.33809e+07	5.04301e+07	6.83119e+07
M172T333	N-Butyryl-L-homoserine lactone	172.097	333.156	171.089	0.891834	C8H13NO3	C11837	[M+H]+	BioDeepDB	2.34013e-06	7.82765e+07	5.84102e+07	1.13704e+08	5.70496e+07	4.49854e+07	4.58368e+07	1.29659e+08	1.12408e+08	1.21743e+08
M132T154_2	N-Carbamoylputrescine	132.102	154.337	131.106	1.18806	C5H13N3O	C00436	[M+H]+	BioDeepDB	0.306074	2.24237e+07	4.69942e+07	3.40595e+07	2.47393e+07	2.08072e+07	6.76528e+07	3.06535e+07	2.67987e+07	3.14638e+07
M252T530	N-D-Ribosylpurine	252.092	530.04	252.086	22.4235	C10H12N4O4	C15586	[M]+	MetaDNA	0.02754	2.98756e+07	2.51893e+07	3.28877e+07	4.63804e+07	3.9543e+07	4.04496e+07	1.09858e+07	1.41779e+07	1.0395e+07
M286T98_1	N-Glucosylnicotinate	286.091	98.2716	286.093	3.0938	C12H16NO7	C03003	[M]+	BioDeepDB	3.39332e-24	2.6258e+07	2.47984e+07	2.06449e+07	4.3547e+07	4.27286e+07	3.5192e+07	5.34102e+07	4.41775e+07	5.22879e+07
M100T343	N-Methyl-2-pyrrolidinone	100.076	342.673	99.0684	2.23248	C5H9NO	C11118	[M+H]+	mzCloud	1.12587e-05	7.41156e+06	2.00652e+07	2.81702e+07	1.10199e+07	1.14669e+07	9.4511e+06	1.38093e+07	1.22716e+07	1.41629e+07
M144T278	N-Methyl-L-glutamic acid	144.066	277.967	161.069	29.4278	C6H11NO4	C01046	[M+H-H2O]+	BioDeepDB	0.00349553	1.88754e+08	1.19939e+08	4.62958e+08	1.02287e+08	7.97767e+07	8.61936e+07	1.76489e+08	1.49667e+08	2.10426e+08
M152T673	N-Methyltyramine	152.107	673.335	151.1	2.3499	C9H13NO	C02442	[M+H]+	BioDeepDB	0.0147062	2.00145e+07	4.84044e+07	4.58097e+07	1.50051e+07	1.83434e+07	6.34588e+06	1.43551e+07	2.46577e+07	5.10331e+07
M289T525	N-Succinyl-2-amino-6-ketopimelate	289.07	525.296	289.08	1.74768	C11H15NO8	C04462	[M]+	BioDeepDB	1.51431e-11	5.29203e+07	4.37568e+07	8.51626e+07	1.02618e+08	5.47461e+07	8.5125e+07	5.53837e+07	6.38812e+07	7.34359e+07
M112T384_3	N-Vinyl-2-pyrrolidone	112.076	384.381	111.068	2.91899	C6H9NO	C19548	[M+H]+	mzCloud	0.00565986	2.20725e+09	1.27326e+09	2.20787e+09	1.66462e+09	1.76872e+09	1.34136e+09	2.51979e+09	2.08961e+09	2.35022e+09
M136T171	N,N-Dimethyl-1,4-phenylenediamine	136.075	171.197	136.1	2.33574	C8H12N2	C04203	[M]+	BioDeepDB	0.000110003	3.77847e+07	4.34254e+07	4.68626e+07	2.75566e+07	7.95305e+06	6.52609e+06	7.82185e+07	6.03633e+07	5.70856e+07
M183T737	N,N-Dimethylhistidine	183.102	736.722	183.101	1.88336	C8H13N3O2	C04259	[M]+	BioDeepDB	0.219485	2.29382e+07	1.62711e+07	2.69698e+07	3.65629e+07	2.97071e+07	2.62388e+07	3.89115e+07	3.23018e+07	4.44624e+07
M328T781	N,N-Dimethylsphingosine	328.32	781.149	327.314	3.2133	C20H41NO2	C13914	[M+H]+	BioDeepDB	6.45891e-07	1.55691e+07	7.57328e+06	1.03626e+07	1.4678e+07	9.3905e+06	9.7115e+06	1.27399e+07	1.27174e+07	8.93889e+06
M161T721	N(6)-Methyllysine	161.132	720.53	160.121	0.829749	C7H16N2O2	C02728	[M+H]+	BioDeepDB	2.17724e-06	1.40321e+07	1.01976e+07	1.97242e+07	1.55809e+07	1.64058e+07	1.34123e+07	1.34477e+07	1.32103e+07	1.51124e+07
M191T497	N(omega)-Hydroxyarginine	191.106	496.64	190.107	19.9114	C6H14N4O3	C05933	[M+H]+	BioDeepDB	0.251479	3.42201e+07	2.21101e+07	3.92569e+07	4.46865e+07	4.14514e+07	3.96732e+07	4.43776e+07	3.94349e+07	5.02943e+07
M286T700	N1,N12-Diacetylspermine	286.237	700.092	286.237	1.13002	C14H30N4O2	C03413	[M]+	BioDeepDB	2.88031e-06	1.69464e+07	1.59127e+07	1.43166e+07	1.15999e+07	1.09296e+07	1.28679e+07	1.19049e+07	1.00678e+07	9.81127e+06
M171T171	N6-Acetyl-L-lysine	171.113	171.184	188.116	26.435	C8H16N2O3	C02727	[M+H-H2O]+	MoNA	0.00133592	1.82187e+08	1.66791e+08	4.13451e+08	4.80887e+07	6.1121e+07	5.35896e+07	7.77903e+07	8.50449e+07	1.14783e+08
M275T832	Nandrolone	275.2	832.069	274.193	2.63843	C18H26O2	C07254	[M+H]+	MoNA	2.60209e-08	3.29073e+07	2.08765e+07	3.05244e+07	1.90872e+07	2.48179e+07	1.87043e+07	2.52705e+07	2.55979e+07	2.58045e+07
M272T743	Neocembrene	272.257	743.363	272.25	26.032	C20H32	C09140	[M]+	BioDeepDB	0.00495238	1.22227e+07	1.1939e+07	1.11232e+07	1.11755e+07	1.06244e+07	1.07717e+07	1.20133e+07	1.06176e+07	9.42467e+06
M353T331	Neochlorogenic acid	353.087	331.46	354.095	1.67121	C16H18O9	C17147	[M-H]-	mzCloud	9.1018e-21	7.04061e+06	2.60925e+07	3.18999e+07	7.6102e+07	2.21307e+07	5.70046e+07	1.47226e+07	2.14231e+07	6.42506e+07
M123T102	Niacinamide	123.055	101.828	122.048	3.26714	C6H6N2O	C00153	[M+H]+	MoNA	6.66182e-08	2.63799e+07	8.6012e+07	7.51999e+07	1.51847e+08	8.45666e+07	7.517e+07	1.60166e+07	5.48727e+07	5.18505e+07
M122T152	Nicotinic acid	122.024	151.681	123.032	0.256544	C6H5NO2	C00253	[M-H]-	BioDeepDB	1.21509e-08	3.85975e+07	3.2027e+07	3.96068e+07	2.71472e+07	3.18231e+07	2.48219e+07	2.82572e+07	3.72642e+07	3.33529e+07
M403T780	Nobiletin	403.138	779.844	402.132	0.920473	C21H22O8	C10112	[M+H]+	BioDeepDB	4.24e-06	2.45425e+07	1.53876e+07	9.62375e+06	5.78113e+06	1.50602e+07	7.41493e+06	4.09649e+06	4.38425e+06	4.63489e+06
M219T825	Nootkatone	219.174	824.568	218.167	2.55157	C15H22O	C17914	[M+H]+	mzCloud	6.31266e-14	5.27725e+07	1.28618e+07	5.50502e+07	4.70833e+07	7.05798e+07	2.07957e+07	1.67352e+07	1.65705e+07	2.02915e+07
M304T199	Nopaline	304.15	199.3	304.138	0.829292	C11H20N4O6	C01682	[M]+	BioDeepDB	1.68873e-05	1.00123e+07	7.49192e+06	1.0938e+07	1.21028e+07	1.13647e+07	9.37718e+06	2.30222e+07	1.9343e+07	2.19914e+07
M170T297	Norepinephrine	170.08	296.939	169.074	2.94119	C8H11NO3	C00547	[M+H]+	BioDeepDB	0.152361	2.8513e+07	1.67511e+07	2.23362e+07	2.35319e+07	2.17136e+07	1.7063e+07	2.59052e+07	2.80001e+07	3.04206e+07
M149T605	Nornicotine	149.107	604.553	148.1	1.57712	C9H12N2	C06524	[M+H]+	MoNA	0.00256123	2.52471e+07	1.16518e+07	3.51528e+07	4.06858e+06	3.64012e+06	6.57204e+06	1.17236e+07	1.82202e+07	1.14706e+07
M333T308	Norsanguinarine	333.115	308.359	333.1	1.76345	C20H15NO4	C05191	[M]+	BioDeepDB	2.06778e-06	1.69551e+07	1.13131e+07	1.27051e+07	2.57371e+07	2.72715e+07	2.46173e+07	1.725e+07	1.50811e+07	1.7633e+07
M162T172	O-Acetyl-L-homoserine	162.076	171.766	161.069	1.47909	C6H11NO4	C01077	[M+H]+	BioDeepDB	1.70672e-05	7.32421e+07	1.18955e+07	5.98268e+07	7.51161e+07	1.43383e+07	6.01496e+07	7.42643e+07	5.66283e+07	7.27257e+07
M204T147_2	O-Acetylcarnitine	204.123	146.96	204.124	0.856819	C9H18NO4	C02571	[M+H]+	BioDeepDB	0.0520303	2.31263e+07	2.09605e+07	3.62155e+07	3.3308e+07	1.84111e+07	2.31665e+07	1.58025e+07	1.16889e+07	1.155e+07
M142T63_1	O-Phosphoethanolamine	141.958	62.9592	141.019	5.27097	C2H8NO4P	C00346	[M+H]+	BioDeepDB	6.29768e-09	1.3366e+09	6.43782e+08	2.19262e+08	8.28359e+08	7.6786e+08	3.01556e+08	6.13679e+08	5.74812e+08	2.22771e+08
M202T96	O-Succinyl-L-homoserine	202.071	96.0532	219.074	18.2716	C8H13NO6	C01118	[M+H-H2O]+	BioDeepDB	0.0611738	3.14952e+07	2.26785e+07	1.60282e+07	7.29432e+07	6.09702e+07	5.06099e+07	4.28362e+07	3.59032e+07	4.44821e+07
M282T705	Oleamide	282.278	705.469	281.272	5.19338	C18H35NO	C19670	[M+H]+	BioDeepDB	6.07316e-09	9.13383e+07	2.43384e+07	2.48247e+07	7.33258e+07	1.27019e+07	2.43478e+07	7.04167e+06	2.40579e+07	2.24068e+07
M282T796	Oleic acid	282.279	795.907	282.256	0.169998	C18H34O2	C00712	[M]+	BioDeepDB	1.5725e-10	9.96814e+08	4.80102e+09	1.47861e+09	3.48917e+09	2.04785e+09	2.67599e+09	1.7147e+09	2.32288e+09	1.8666e+09
M449T469	Orientin	449.105	468.586	448.101	5.62017	C21H20O11	C10114	[M+H]+	mzCloud	1.88498e-06	2.1737e+07	2.23005e+07	2.60939e+07	3.50519e+07	6.77137e+06	2.18981e+07	8.95151e+06	2.42417e+07	2.97855e+07
M613T406_1	Oxidized glutathione	613.151	405.986	612.152	14.1779	C20H32N6O12S2	C00127	[M+H]+	MetaDNA	0.000444737	2.83631e+07	2.53215e+07	3.52422e+07	5.74134e+07	5.53446e+07	4.24194e+07	3.81576e+07	2.49471e+07	4.0085e+07
M159T141	Oxoadipic acid	158.978	140.845	160.037	2.52866	C6H8O5	C00322	[M-H]-	BioDeepDB	1.26295e-06	3.8794e+08	1.61254e+07	3.71132e+07	1.18564e+08	1.75641e+07	3.12671e+08	8.96698e+07	1.25273e+08	3.60529e+07
M138T444	p-Aminobenzoic acid	138.055	444.04	137.048	0.982325	C7H7NO2	C00568	[M+H]+	BioDeepDB	0.00527881	3.80387e+07	2.05991e+07	4.33381e+07	1.73974e+07	1.10366e+08	1.56078e+07	9.01382e+07	8.65646e+07	2.71216e+07
M309T570	p-Coumaroyl-D-glucose	309.096	570.263	326.1	10.7921	C15H18O8	C16827	[M+H-H2O]+	MetaDNA	0.0221137	1.63973e+07	1.38561e+07	1.65891e+07	1.90509e+07	2.19269e+07	1.87694e+07	2.18451e+07	1.90714e+07	2.00829e+07
M154T623	p-Octopamine	154.086	622.756	153.079	2.27376	C8H11NO2	C04227	[M+H]+	BioDeepDB	2.0403e-06	2.47818e+07	3.32028e+07	4.61851e+07	2.59541e+07	5.54554e+06	1.87176e+07	3.51573e+07	7.9588e+06	4.58506e+07
M255T780	Palmitic acid	255.234	780.377	256.24	4.33897	C16H32O2	C00249	[M-H]-	BioDeepDB	4.6357e-16	1.63153e+07	8.7555e+06	1.95007e+07	3.29332e+06	3.02596e+07	9.95057e+06	9.53591e+06	2.7308e+06	2.84922e+06
M300T815	Palmitoylethanolamide	300.289	814.995	299.282	2.75164	C18H37NO2	C16512	[M+H]+	BioDeepDB	1.12258e-09	3.48734e+07	4.26289e+07	4.5943e+07	4.18585e+07	3.37625e+07	3.04315e+07	3.23537e+07	2.67229e+07	3.10667e+07
M220T361	Pantothenic acid	220.117	360.763	219.111	2.63786	C9H17NO5	C00864	[M+H]+	BioDeepDB	6.42621e-16	1.52897e+07	1.14021e+07	1.72147e+07	4.13195e+07	3.92662e+07	2.61341e+07	4.17092e+07	2.79704e+07	3.68948e+07
M157T792	Pelargonic acid	157.122	791.921	158.131	0.400491	C9H18O2	C01601	[M-H]-	BioDeepDB	4.96339e-05	1.61823e+07	1.46867e+07	1.52172e+07	1.52393e+07	1.82024e+07	1.52772e+07	1.77053e+07	1.30654e+07	1.32355e+07
M579T473	Pelargonidin 3-(6-p-coumaroyl)glucoside	579.153	472.651	579.15	5.43365	C30H27O12	C16368	[M]+	MetaDNA	0.0623325	3.3505e+06	2.46453e+06	1.40847e+07	3.21915e+07	3.0452e+07	1.77302e+07	1.40596e+07	1.38826e+07	1.56773e+07
M303T450	Pentahydroxyflavanone	303.05	449.624	304.058	3.43474	C15H12O7	C05911	[M-H]-	MetaDNA	0.0532035	5.16463e+07	3.36866e+07	5.35539e+07	4.318e+07	5.19378e+07	3.94948e+07	3.17337e+07	4.68932e+07	4.02928e+07
M269T514	Pentostatin	269.128	513.807	268.117	11.9469	C11H16N4O4	C02267	[M+H]+	BioDeepDB	3.3624e-05	2.1793e+07	1.80036e+07	2.4345e+07	1.32085e+07	8.73743e+06	8.24825e+06	1.04136e+07	1.01101e+07	1.11119e+07
M167T648	Perillic acid	167.107	647.529	166.099	0.0375486	C10H14O2	C11924	[M+H]+	BioDeepDB	6.19732e-07	2.76466e+07	1.49527e+07	4.16009e+07	2.73385e+07	4.6474e+07	1.65877e+07	1.6033e+07	1.74316e+07	1.83834e+07
M153T712	Perillyl alcohol	153.128	712.262	152.12	1.62668	C10H16O	C02452	[M+H]+	BioDeepDB	3.79088e-13	5.70109e+07	1.03541e+08	5.97366e+07	1.41373e+08	1.04058e+08	9.84267e+07	5.01609e+07	3.79916e+07	4.91453e+07
M151T762_2	Perillyl aldehyde	151.111	761.999	150.105	4.8354	C10H14O	C02576	[M+H]+	BioDeepDB	2.78867e-06	5.70103e+08	3.33511e+08	8.83849e+08	3.89278e+08	3.40741e+08	3.42844e+08	5.21956e+08	4.97423e+08	6.78447e+08
M137T365	Phenelzine	137.107	365.093	136.1	1.90005	C8H12N2	C07430	[M+H]+	BioDeepDB	0.000183357	5.50173e+08	4.04995e+08	6.97894e+08	2.68831e+08	2.61614e+08	2.98765e+08	5.06689e+08	4.1754e+08	5.07765e+08
M93T383	Phenol	93.0331	382.976	94.0419	15.962	C6H6O	C00146	[M-H]-	MetaDNA	0.0261921	1.32826e+07	1.08267e+07	1.63522e+07	2.48594e+07	2.59852e+07	2.15459e+07	1.43717e+07	1.36874e+07	1.68573e+07
M135T67	Phenyl acetate	134.892	67.0776	136.052	5.45628	C8H8O2	C00548	[M-H]-	BioDeepDB	2.97176e-08	2.19047e+07	2.02978e+07	1.85882e+07	2.67394e+07	6.72757e+06	1.57327e+07	1.64405e+07	1.46913e+07	1.79584e+07
M119T361	Phenylacetaldehyde	119.049	361.443	120.058	1.64108	C8H8O	C00601	[M-H]-	BioDeepDB	2.95366e-05	4.17131e+07	2.07559e+07	4.28278e+07	5.92224e+07	5.67534e+07	5.38891e+07	4.74189e+07	4.58858e+07	5.86133e+07
M137T668	Phenylacetic acid	137.132	667.827	136.052	2.56298	C8H8O2	C07086	[M+H]+	BioDeepDB	6.94632e-10	2.82128e+07	2.0892e+07	2.75351e+07	2.5111e+07	2.50317e+07	2.18216e+07	2.43441e+07	2.42639e+07	2.33834e+07
M168T690	Phenylephrine	168.101	689.841	167.095	2.44761	C9H13NO2	C07441	[M+H]+	BioDeepDB	0.0933346	2.10657e+07	3.29235e+07	3.48104e+07	1.16964e+07	9.03751e+06	1.89003e+07	1.40443e+07	1.43765e+07	1.80583e+07
M121T615	Phenylethylamine	121.029	615.111	121.089	2.74445	C8H11N	C05332	[M]-	BioDeepDB	1.28356e-15	1.30533e+07	3.97469e+06	3.41584e+07	1.56007e+07	1.19924e+07	2.47638e+07	4.66485e+06	2.33964e+07	4.99581e+06
M275T563	Phloretin	275.09	563.163	274.084	3.3881	C15H14O5	C00774	[M+H]+	mzCloud	3.20877e-05	1.9884e+07	8.28781e+06	1.10474e+07	2.23919e+07	1.7014e+07	1.36071e+07	3.2937e+07	1.72899e+07	1.77791e+07
M157T780	Phosphoglycolic acid	156.99	780.457	155.982	4.09111	C2H5O6P	C00988	[M+H]+	BioDeepDB	0.183489	9.25009e+06	9.24579e+06	1.86642e+07	7.90506e+06	2.13631e+07	2.47755e+07	3.25744e+07	3.5963e+07	3.73915e+07
M140T101_1	Phosphonoacetate	140.07	101.419	139.988	10.5604	C2H5O5P	C05682	[M]+	BioDeepDB	0.0175293	1.26212e+08	9.79293e+07	1.48218e+08	8.00491e+07	6.78437e+07	6.11426e+07	7.12555e+07	6.33857e+07	8.59552e+07
M167T756	Phthalic acid	167.106	756.142	166.027	3.30028	C8H6O4	C01606	[M+H]+	BioDeepDB	0.000229725	2.12529e+07	1.51764e+07	2.94526e+07	1.62689e+07	1.35899e+07	1.30376e+07	1.50001e+07	1.4756e+07	2.52107e+07
M300T795	Phytosphingosine	300.289	794.684	317.293	10.8598	C18H39NO3	C12144	[M+H-H2O]+	MoNA	7.99306e-05	2.9548e+08	2.59346e+08	2.94006e+08	1.25257e+08	1.02592e+08	9.3482e+07	4.74567e+07	4.26679e+07	4.56627e+07
M160T194	Pimelic acid	159.968	194.125	160.074	6.7569	C7H12O4	C02656	[M]+	BioDeepDB	1.0048e-05	1.69928e+08	4.45474e+07	1.13477e+08	5.22594e+07	1.36351e+08	1.52981e+08	1.02232e+08	8.93516e+07	2.36376e+07
M130T174_2	Pipecolic acid	130.049	173.796	129.079	12.9176	C6H11NO2	C00408	[M+H]+	BioDeepDB	1.56482e-15	7.79054e+09	6.10713e+09	8.63216e+09	4.44213e+09	4.80838e+09	4.16877e+09	6.57139e+09	5.43583e+09	6.29205e+09
M226T671	Porphobilinogen	226.091	670.51	226.095	20.6984	C10H14N2O4	C00931	[M]+	BioDeepDB	0.112353	3.65637e+06	2.7008e+06	3.90772e+06	1.1312e+07	1.30605e+07	9.93097e+06	6.82539e+06	5.28093e+06	5.65463e+06
M341T813	Prednisone	341.167	813.134	358.178	10.6171	C21H26O5	C07370	[M+H-H2O]+	BioDeepDB	0.364771	2.43606e+06	3.2228e+08	1.3743e+07	3.92362e+07	1.30008e+06	1.67319e+06	1.01259e+06	5.45462e+06	4.50944e+06
M236T101_2	Procaine	236.149	101.177	236.153	16.5819	C13H20N2O2	C07375	[M]+	BioDeepDB	0.422326	3.20823e+08	3.29569e+08	3.90417e+08	3.19443e+08	2.81711e+08	2.33442e+08	3.72958e+08	3.29142e+08	3.50428e+08
M579T500	Procyanidin B2	579.15	500.394	578.142	0.0428677	C30H26O12	C17639	[M+H]+	BioDeepDB	6.19854e-10	9.76404e+06	9.56557e+06	9.75454e+06	2.35465e+07	1.2152e+07	1.59072e+07	1.33122e+07	1.7822e+07	1.3671e+07
M865T448_3	Procyanidin C1	865.21	448.19	866.206	12.6773	C45H38O18	C17624	[M-H]-	MoNA	6.01307e-06	9.33167e+06	6.27689e+06	9.6275e+06	2.08204e+07	1.98915e+07	1.44475e+07	1.33306e+07	1.79356e+07	1.53384e+07
M355T826	Prostaglandin F2a	355.283	825.652	354.241	3.27823	C20H34O5	C00639	[M+H]+	BioDeepDB	2.06755e-05	1.58226e+07	1.22027e+07	1.57176e+07	8.70839e+06	7.53905e+06	5.61624e+06	9.53433e+06	8.31756e+06	9.14692e+06
M153T469	Protocatechuic acid	153.017	468.603	154.027	15.0184	C7H6O4	C00230	[M-H]-	BioDeepDB	4.6544e-11	9.0909e+07	7.34416e+07	1.11042e+08	3.60687e+07	9.66485e+07	1.00435e+08	1.08398e+08	9.70743e+07	1.07964e+08
M595T772	Protochlorophyllide	595.215	771.932	612.222	0.570114	C35H32MgN4O5	C02880	[M+H-H2O]+	BioDeepDB	0.00154474	7.47048e+06	4.63942e+06	6.80682e+06	3.22449e+07	3.07625e+07	2.33857e+07	6.08748e+06	6.60179e+06	1.25813e+07
M153T424	Pulegone	153.127	424.096	152.12	0.00618418	C10H16O	C09893	[M+H]+	BioDeepDB	4.36999e-05	2.01478e+07	1.52397e+07	2.32528e+07	7.24921e+07	7.18517e+07	4.77891e+07	2.32375e+07	2.19872e+07	2.06016e+07
M181T397	Pyridostigmine	181.096	396.744	181.098	3.33664	C9H13N2O2	C07410	[M+H]+	BioDeepDB	3.96356e-07	8.70745e+07	6.75943e+07	1.10063e+08	3.69977e+07	3.12581e+07	3.0788e+07	7.79336e+07	7.23339e+07	7.5383e+07
M170T102	Pyridoxine	170.08	101.671	169.074	4.90173	C8H11NO3	C00314	[M+H]+	BioDeepDB	3.15292e-16	8.70717e+07	6.98232e+07	8.97938e+07	1.00515e+08	7.5981e+07	7.13785e+07	9.38376e+07	8.50628e+07	1.01286e+08
M221T289	Pyrimidodiazepine	221.092	288.993	221.091	0.922976	C9H11N5O2	C02587	[M]+	BioDeepDB	7.73109e-07	1.33647e+07	9.65705e+06	1.4808e+07	3.34863e+07	3.21729e+07	1.94071e+07	1.66239e+07	1.12377e+07	1.5365e+07
M130T90	Pyroglutamic acid	130.049	89.9804	129.043	4.8141	C5H7NO3	C01879	[M+H]+	BioDeepDB	2.33119e-16	5.22337e+07	6.18084e+07	7.09689e+07	1.14759e+08	1.09807e+08	9.33964e+07	1.08267e+08	9.53218e+07	1.10636e+08
M111T710	Pyrrole-2-carboxylic acid	111.02	709.769	111.032	1.43566	C5H5NO2	C05942	[M]+	BioDeepDB	1.56636e-07	9.73129e+07	9.76543e+07	2.32724e+07	1.28167e+08	2.2411e+07	1.07348e+08	8.08578e+07	6.85424e+07	9.07331e+07
M265T473	Qing Hau Sau	265.143	472.715	282.147	12.5502	C15H22O5	C09538	[M+H-H2O]+	mzCloud	3.3291e-05	2.68816e+07	2.06808e+07	3.24971e+07	1.78268e+07	1.56187e+07	1.45702e+07	1.77739e+07	1.44833e+07	1.41509e+07
M301T718	Quercetin	301.165	718.482	302.043	20.7974	C15H10O7	C00389	[M-H]-	BioDeepDB	5.89459e-05	3.16459e+06	3.34982e+06	6.54582e+06	1.75269e+06	1.82983e+06	3.0335e+06	1.36793e+06	1.54109e+06	2.06515e+06
M465T508_1	Quercetin 3-O-glucoside	465.1	508.228	464.096	4.97122	C21H20O12	C05623	[M+H]+	mzCloud	1.78211e-22	1.04549e+09	9.47612e+08	9.98294e+08	1.24121e+09	1.03224e+09	8.32591e+08	1.2486e+09	1.24402e+09	1.47737e+09
M449T559_1	Quercitrin	449.103	558.889	448.101	9.40607	C21H20O11	C01750	[M+H]+	BioDeepDB	1.00626e-15	2.5114e+07	6.58577e+07	4.61115e+07	7.67036e+07	2.28144e+07	6.59332e+07	3.09359e+07	2.81716e+07	7.73007e+07
M191T85_2	Quinate	191.126	84.8552	192.063	2.53511	C7H12O6	C00296	[M-H]-	BioDeepDB	2.51466e-31	4.36967e+07	3.27623e+07	3.59244e+07	3.07556e+07	3.20779e+07	3.72424e+07	4.89715e+07	4.24466e+07	5.1271e+07
M129T408	Quinoline	129.055	408.387	129.058	1.77561	C9H7N	C06413	[M]+	BioDeepDB	0.128208	2.36706e+08	1.81062e+08	2.92758e+08	2.10741e+08	1.53905e+08	1.50517e+08	2.2394e+08	1.92093e+08	2.13108e+08
M167T339	Quinolinic acid	167.012	338.507	167.022	3.38333	C7H5NO4	C03722	[M]+	BioDeepDB	5.19754e-06	3.79986e+08	2.34182e+08	5.13453e+08	2.41806e+08	1.99347e+08	3.06298e+08	1.49689e+08	1.67043e+08	5.59444e+07
M485T101_1	Raffinose	485.148	100.722	504.169	4.68208	C18H32O16	C00492	[M-H2O-H]-	mzCloud	0.11503	3.7624e+07	3.85171e+07	4.69309e+07	3.00054e+07	5.14122e+07	6.52472e+07	5.14264e+07	6.61825e+07	5.94174e+07
M476T803	Retinoyl b-glucuronide	476.275	802.529	476.241	0.0491223	C26H36O8	C11061	[M]+	BioDeepDB	3.66625e-12	6.66636e+06	1.26252e+06	2.08658e+06	1.12731e+07	7.80879e+06	3.90528e+06	1.38578e+07	9.21571e+06	3.18367e+06
M133T91	Ribitol	133.049	90.9898	152.069	9.98262	C5H12O5	C00474	[M-H2O-H]-	BioDeepDB	0.00105005	1.4804e+08	1.74916e+08	1.84841e+08	1.96505e+08	1.66059e+08	1.71464e+08	2.76555e+08	2.44522e+08	2.87098e+08
M609T601_2	Rutin	609.13	601.216	610.153	27.1203	C27H30O16	C05625	[M-H]-	mzCloud	2.20127e-08	7.24951e+06	1.48542e+07	2.68821e+07	3.51647e+07	2.55574e+07	3.03793e+07	6.32865e+07	3.92743e+07	3.56623e+07
M517T674	S-(Hydroxymethyl)mycothiol	517.205	674.377	516.163	3.09526	C18H32N2O13S	C18235	[M+H]+	BioDeepDB	8.94275e-05	5.94995e+06	6.81201e+06	1.08454e+07	1.6727e+07	7.96817e+06	6.66386e+06	1.37301e+07	1.46042e+07	1.56191e+07
M440T92	S-[(Z)-N-Hydroxy(phenyl)acetimidoyl]-L-glutathione	440.139	91.5189	440.137	6.48088	C18H24N4O7S	C21622	[M]-	MetaDNA	0.0116624	1.08149e+08	1.12403e+08	1.29224e+08	8.14548e+07	8.04721e+07	9.36224e+07	1.356e+08	1.08486e+08	1.40226e+08
M355T360	S-Adenosylmethioninamine	355.149	359.537	355.155	3.59021	C14H23N6O3S	C01137	[M]+	BioDeepDB	5.82296e-05	1.23506e+07	7.26613e+06	1.19759e+07	2.23665e+07	2.13989e+07	1.7742e+07	2.43421e+07	1.68575e+07	2.28625e+07
M398T803	S-Adenosylmethionine	398.24	803.3	398.137	1.26259	C15H22N6O5S	C00019	[M]+	BioDeepDB	8.13829e-09	1.47335e+07	2.01304e+07	1.19936e+07	1.26335e+07	1.28169e+07	1.22388e+07	1.12427e+07	1.35571e+07	1.25863e+07
M427T525	S-Glutathionyl-L-cysteine	427.101	525.296	426.088	2.33804	C13H22N4O8S2	C05526	[M+H]+	BioDeepDB	0.000183213	3.72922e+07	3.31075e+07	4.00269e+07	6.09203e+07	5.77239e+06	4.00163e+07	5.48998e+06	1.99225e+07	4.47212e+07
M391T739	S-Hexyl-glutathione	391.286	738.99	391.178	6.05507	C16H29N3O6S	C02886	[M]+	BioDeepDB	3.50962e-17	1.40291e+07	5.60516e+06	1.94969e+07	2.83446e+07	1.95135e+07	1.76253e+07	1.67084e+07	1.65119e+07	1.51474e+07
M259T604_2	Saccharopine	259.122	603.966	276.132	8.41905	C11H20N2O6	C00449	[M+H-H2O]+	BioDeepDB	0.00736999	2.41096e+07	1.22502e+07	2.04774e+07	5.07317e+06	5.39945e+06	5.28484e+06	4.3056e+06	3.88139e+06	4.441e+06
M287T701	Sakuranetin	287.088	700.981	286.084	12.5526	C16H14O5	C09833	[M+H]+	MoNA	1.23155e-08	9.28551e+06	7.41751e+06	6.31401e+06	1.08752e+07	9.70113e+06	8.22129e+06	1.0572e+07	8.78416e+06	1.06343e+07
M123T575	Salicyl alcohol	123.044	575.077	124.052	9.19936	C7H8O2	C02323	[M-H]-	mzCloud	9.45215e-07	7.98857e+06	9.00482e+06	1.1023e+07	2.64496e+06	3.62575e+06	2.15509e+06	2.648e+06	4.77582e+06	3.59671e+06
M137T383_3	Salicylic acid	137.066	382.976	138.032	0.0942842	C7H6O3	C00805	[M-H]-	BioDeepDB	2.04532e-26	4.45082e+06	3.1207e+06	4.47234e+06	8.73949e+06	8.32492e+06	7.0209e+06	3.81826e+06	4.46009e+06	4.45874e+06
M194T309	Salicyluric acid	194.045	308.661	195.053	3.53924	C9H9NO4	C07588	[M-H]-	BioDeepDB	3.25629e-05	2.93079e+07	2.22614e+07	3.71679e+07	2.38243e+07	2.01247e+07	1.9964e+07	2.88539e+07	2.82694e+07	3.41085e+07
M333T460	Sanguinarine	333.096	459.647	332.092	3.29386	C20H14NO4	C06162	[M+H]+	BioDeepDB	3.76732e-05	4.08853e+07	1.79167e+07	2.97164e+07	2.4027e+07	6.13889e+07	3.30611e+07	4.63062e+07	3.55626e+07	4.08897e+07
M89T78	Sarcosine	88.9866	78.3574	89.0477	2.73191	C3H7NO2	C00213	[M]-	BioDeepDB	1.468e-10	3.42364e+07	3.52973e+07	4.10681e+07	5.58346e+07	4.75908e+07	5.11057e+07	3.61991e+07	3.9166e+07	4.40998e+07
M547T511_1	Schaftoside	547.139	511.028	564.148	3.46472	C26H28O14	C10181	[M+H-H2O]+	mzCloud	5.43046e-06	3.1474e+07	3.24552e+07	9.22221e+06	2.17303e+07	1.00474e+07	1.40626e+07	9.06936e+06	1.32283e+07	4.93689e+06
M156T433	Scopoline	156.102	433.289	155.095	0.705753	C8H13NO2	C10866	[M+H]+	BioDeepDB	0.00940202	4.93262e+07	3.45898e+07	4.93356e+07	3.80501e+07	2.50131e+07	2.88028e+07	3.45166e+07	3.01782e+07	3.76976e+07
M183T445	Se-Methylselenocysteine	182.985	444.896	182.98	4.09676	C4H9NO2Se	C05689	[M]+	BioDeepDB	8.319e-17	1.55801e+07	4.94568e+07	3.87199e+07	3.04998e+07	8.86171e+06	1.12199e+08	1.01726e+08	3.32386e+07	6.74314e+06
M185T510	Sebacic acid	185.117	509.524	202.12	8.17949	C10H18O4	C08277	[M+H-H2O]+	BioDeepDB	2.41381e-05	3.13336e+07	1.88781e+07	4.59347e+07	2.01006e+07	1.84482e+07	1.93952e+07	2.0565e+07	2.0426e+07	2.59214e+07
M375T608	Secologanate	375.142	608.202	374.121	5.45555	C16H22O10	C01957	[M+H]+	BioDeepDB	0.00177035	7.47278e+07	1.21912e+07	8.84308e+07	1.02725e+08	8.31134e+07	7.77548e+07	2.73586e+07	8.22253e+07	2.89059e+07
M173T411	Shikimic acid	173.044	411.461	174.053	6.6533	C7H10O5	C00493	[M-H]-	BioDeepDB	7.25797e-07	2.3494e+07	2.04322e+07	3.14993e+07	5.88575e+07	6.17662e+07	5.59801e+07	5.59251e+07	5.36175e+07	5.9483e+07
M483T573	Silibinin	483.126	572.838	482.121	4.32629	C25H22O10	C07610	[M+H]+	BioDeepDB	0.0118289	1.2853e+07	1.94055e+07	3.17782e+07	6.40623e+07	5.73053e+07	5.93755e+07	5.69376e+07	3.85287e+07	4.41393e+07
M415T822_1	Sodium deoxycholate	415.21	821.819	414.275	0.851771	C24H39O4. Na	C11171	[M+H]+	BioDeepDB	2.83223e-06	1.0109e+08	1.13036e+08	9.41508e+07	7.86073e+07	7.63214e+07	1.09379e+08	8.74324e+07	1.37519e+08	9.55236e+07
M183T339	Sorbitol	182.986	338.83	182.079	2.54601	C6H14O6	C00794	[M+H]+	BioDeepDB	5.1502e-13	1.29811e+08	1.25206e+08	2.39147e+08	2.80895e+08	8.68063e+07	1.70941e+08	3.9379e+07	1.93673e+08	1.71672e+08
M302T792	Sphinganine	302.305	791.767	301.298	0.400839	C18H39NO2	C00836	[M+H]+	BioDeepDB	2.89059e-12	9.70775e+06	5.87262e+06	1.00108e+07	7.72726e+06	7.83375e+06	1.64799e+06	1.25949e+07	1.10076e+07	1.62218e+07
M282T635_2	Sphingosine	282.278	635.365	299.282	2.07436	C18H37NO2	C00319	[M+H-H2O]+	BioDeepDB	0.00243491	5.26053e+07	9.1298e+06	1.13211e+08	8.36768e+07	1.35586e+07	6.07281e+06	3.47424e+07	2.22814e+07	3.32723e+07
M283T776	Stearic acid	283.262	776.108	284.272	6.64089	C18H36O2	C01530	[M-H]-	MoNA	0.000195973	3.78823e+06	1.21366e+07	9.43527e+06	3.73758e+06	2.75427e+07	7.89829e+06	2.57479e+07	1.25092e+07	1.35931e+07
M275T828	Stearidonic acid	275.201	828.046	276.209	0.56063	C18H28O2	C16300	[M-H]-	BioDeepDB	1.49547e-10	2.87342e+06	2.44714e+06	3.97556e+06	1.55217e+06	1.76699e+06	1.51694e+06	1.01878e+07	9.01439e+06	7.12394e+06
M173T303	Suberic acid	173.08	302.979	174.089	0.559525	C8H14O4	C08278	[M-H]-	BioDeepDB	1.09338e-07	4.20059e+06	3.74357e+06	3.82921e+06	2.3802e+07	2.62631e+07	1.85515e+07	3.82233e+07	3.30262e+07	4.57433e+07
M117T80_2	Succinic acid	117.017	79.5975	118.027	6.6733	C4H6O4	C00042	[M-H]-	BioDeepDB	6.89217e-22	7.6993e+08	5.36961e+08	1.01332e+09	7.86267e+08	7.51245e+08	6.28127e+08	1.20522e+09	1.09837e+09	1.33706e+09
M102T756	Succinic acid semialdehyde	102.034	756.135	102.032	3.65983	C4H6O3	C00232	[M]+	BioDeepDB	7.88476e-05	1.0702e+08	5.82399e+07	1.1282e+07	4.24874e+07	4.04486e+07	1.10053e+07	3.67333e+07	1.00516e+07	7.51496e+06
M197T539_2	Syringic acid	197.044	539.293	198.053	9.31241	C9H10O5	C10833	[M-H]-	mzCloud	3.33775e-05	7.75106e+07	4.32455e+07	9.62057e+07	3.23373e+07	3.26755e+07	2.98566e+07	1.87243e+07	1.87525e+07	3.02876e+07
M373T804	Tangeritin	373.127	804.436	372.121	4.11077	C20H20O7	C10190	[M+H]+	BioDeepDB	2.50611e-07	9.57817e+07	1.83354e+07	8.19031e+06	2.00826e+06	6.80931e+06	8.30805e+06	9.9916e+06	2.93429e+06	4.3696e+06
M126T137	Taurine	125.986	136.816	125.015	2.46964	C2H7NO3S	C00245	[M+H]+	BioDeepDB	6.28797e-06	1.34732e+08	2.33425e+08	6.97175e+07	1.94313e+08	2.21247e+08	2.08423e+08	1.72488e+08	4.18833e+07	1.55272e+08
M303T411	Taxifolin	303.05	410.837	304.058	1.24485	C15H12O7	C01617	[M-H]-	BioDeepDB	0.000263434	7.06754e+07	5.01626e+07	8.08247e+07	4.45823e+07	7.70691e+07	6.19314e+07	4.97202e+07	4.64513e+07	5.76038e+07
M165T409	Terephthalic acid	165.019	409.078	166.027	4.5467	C8H6O4	C06337	[M-H]-	BioDeepDB	7.79271e-07	4.65139e+07	4.18211e+07	6.5778e+07	1.32829e+08	1.10191e+08	7.69853e+07	6.56218e+07	6.20117e+07	1.03517e+08
M181T765	Theobromine	181.07	764.745	180.065	11.7159	C7H8N4O2	C07480	[M+H]+	GNPS	4.35404e-10	7.86922e+07	1.7415e+08	2.74327e+07	4.24608e+07	1.56369e+08	8.43496e+07	5.28271e+07	5.93153e+07	5.92799e+07
M181T393	Theophylline	181.073	392.62	180.065	2.97349	C7H8N4O2	C07130	[M+H]+	BioDeepDB	7.49006e-20	5.62472e+08	3.49254e+08	1.21834e+09	1.55832e+08	5.37298e+08	1.33936e+08	3.18389e+08	2.73695e+08	3.25605e+08
M241T343	Thymidine	241.082	342.861	242.09	1.70751	C10H14N2O5	C00214	[M-H]-	BioDeepDB	3.61169e-05	4.66782e+06	3.41778e+06	5.72616e+06	3.919e+06	3.67366e+06	3.50266e+06	4.03234e+06	3.79037e+06	4.68023e+06
M127T341	Thymine	127.05	341.492	126.043	0.775579	C5H6N2O2	C00178	[M+H]+	BioDeepDB	1.03732e-05	1.70945e+07	1.16999e+07	1.4995e+07	1.07284e+07	1.09423e+07	8.81706e+06	9.0057e+06	7.95918e+06	9.80557e+06
M147T713	trans-Cinnamate	146.965	712.548	148.052	0.573026	C9H8O2	C00423	[M-H]-	BioDeepDB	4.35538e-17	1.74796e+07	3.30077e+07	1.72836e+07	3.71018e+07	3.05259e+07	2.16934e+07	1.79556e+07	6.22707e+06	1.54397e+07
M193T393	trans-Ferulic acid	193.05	393.262	194.058	0.0335862	C10H10O4	C01494	[M-H]-	BioDeepDB	6.84549e-16	1.80423e+07	1.2279e+07	1.87047e+07	2.54857e+07	2.42409e+07	2.21183e+07	2.07874e+07	1.93516e+07	2.55505e+07
M342T99	Trehalose	342.138	99.499	342.116	3.7028	C12H22O11	C01083	[M]+	BioDeepDB	6.95106e-07	4.16672e+07	5.55064e+07	4.26856e+07	4.26637e+07	4.13812e+07	3.76073e+07	4.71744e+07	4.41677e+07	4.21543e+07
M298T801	Tridemorph	298.309	800.592	297.303	5.33612	C19H39NO	C11285	[M+H]+	mzCloud	0.00135879	1.01622e+07	7.44624e+06	1.86681e+07	5.30098e+06	1.89332e+07	7.62355e+06	1.65101e+07	2.00157e+07	1.53025e+07
M167T504	Tropate	167.081	504.365	166.063	13.5634	C9H10O3	C01456	[M+H]+	BioDeepDB	0.482108	5.86602e+07	2.92129e+07	8.46647e+07	9.36711e+06	1.06883e+07	8.86493e+06	1.70257e+07	1.22674e+07	2.44136e+07
M144T426	Tryptophanol	144.081	426.337	161.084	26.6464	C10H11NO	C00955	[M+H-H2O]+	GNPS	0.00162477	6.62094e+07	4.19283e+07	6.47385e+07	7.71513e+07	7.37168e+07	6.25785e+07	7.74486e+07	6.21701e+07	8.25213e+07
M138T470_1	Tyrosol	138.055	470.224	138.068	0.269794	C8H10O2	C06044	[M]+	BioDeepDB	6.76347e-07	1.73503e+07	3.14972e+07	4.324e+07	2.47855e+07	2.54832e+07	2.4397e+07	1.62906e+07	1.78885e+07	3.86731e+07
M251T685	Ubiquinone-1	251.125	685.08	250.121	1.73223	C14H18O4	C00399	[M+H]+	BioDeepDB	0.0568134	3.15083e+07	2.49258e+07	3.94935e+07	1.67055e+07	1.6914e+07	1.62504e+07	1.24559e+07	9.02963e+06	1.01439e+07
M633T401_2	UDP-2,4-bis(acetamido)-2,4,6-trideoxy-beta-L-altropyranose	633.104	401.311	632.113	4.47526	C19H30N4O16P2	C19971	[M+H]+	BioDeepDB	0.00399801	3.172e+07	2.86781e+07	2.87216e+07	7.21467e+07	3.7437e+07	5.55801e+07	4.77087e+07	4.68439e+07	4.6817e+07
M163T415	Umbelliferone	163.039	414.868	162.032	1.79029	C9H6O3	C09315	[M+H]+	mzCloud	0.0899163	2.30698e+07	4.93555e+06	1.30194e+06	3.0907e+07	6.83475e+06	5.8825e+06	2.00775e+07	4.95676e+06	2.24763e+07
M113T107	Uracil	113.035	106.572	112.027	0.0323373	C4H4N2O2	C00106	[M+H]+	BioDeepDB	8.75836e-05	3.41037e+07	2.86945e+07	3.6776e+07	1.86137e+07	2.051e+07	1.82085e+07	1.87024e+07	1.49236e+07	1.80742e+07
M169T681	Uric acid	169.085	681.151	168.028	2.58307	C5H4N4O3	C00366	[M+H]+	BioDeepDB	1.22456e-05	4.47406e+06	3.98691e+06	1.87908e+07	2.03906e+07	1.53211e+07	2.3796e+07	2.32639e+07	2.10817e+07	2.02799e+07
M243T211	Uridine	243.061	210.677	244.07	3.07759	C9H12N2O6	C00299	[M-H]-	BioDeepDB	6.04661e-07	1.05007e+08	9.43843e+07	1.31849e+08	7.7419e+07	7.80148e+07	7.0877e+07	1.0185e+08	8.81441e+07	1.0763e+08
M137T351	Urocanic acid	137.035	350.574	138.043	2.72855	C6H6N2O2	C00785	[M-H]-	BioDeepDB	1.99342e-05	7.41732e+06	4.90342e+06	7.20602e+06	7.66411e+06	7.03053e+06	3.98186e+06	9.97414e+06	3.97248e+06	5.86628e+06
M197T296	Vanillylmandelic acid	197.042	295.651	198.053	11.6175	C9H10O5	C05584	[M-H]-	BioDeepDB	0.157343	1.32028e+08	1.27813e+08	1.40772e+08	1.01264e+08	8.89498e+07	9.73201e+07	8.87272e+07	8.13684e+07	1.02165e+08
M415T596	Vitexin	415.099	595.835	432.106	1.84641	C21H20O10	C01460	[M+H-H2O]+	BioDeepDB	0.0770482	1.44273e+08	1.00778e+08	1.51343e+08	7.93742e+07	3.68267e+07	4.88157e+07	1.99681e+07	1.61921e+07	4.83861e+07
M152T686	Xanthine	152.034	685.954	152.033	6.27488	C5H4N4O2	C00385	[M]-	BioDeepDB	0.223018	6.78807e+06	5.75023e+06	7.94456e+06	5.42633e+06	1.31696e+06	1.20312e+06	7.2866e+06	6.9222e+06	7.48413e+06
M204T341	Xanthurenic acid	204.029	340.726	205.037	1.16599	C10H7NO4	C02470	[M-H]-	BioDeepDB	3.06089e-09	7.64767e+06	5.59436e+06	8.37137e+06	1.0164e+07	1.06159e+07	8.77066e+06	7.77181e+06	7.26566e+06	8.47953e+06
M219T715	Zerumbone	219.174	715.103	218.167	2.15616	C15H22O	C20262	[M+H]+	mzCloud	0.0872126	1.57058e+08	9.06197e+07	1.48164e+08	2.8249e+08	2.83124e+08	2.12383e+08	1.63901e+08	1.55615e+08	1.94633e+08
