# Supplementary material for: Non-Targeted Metabolomics Analysis Revealed the Characteristic Non-Volatile and Volatile Metabolites in the Rougui Wuyi Rock Tea (Camellia sinensis) from Different Culturing Regions
Source: Foods. 2022 Jun 9;11(12):1694. doi: 10.3390/foods11121694 (PMC9222269; doi:10.3390/foods11121694)
Supplement: Supplementary file 1 [file foods-11-01694-s001.zip › Table S2.xlsx]

## Sheet: 英文
NO.	Compound Name	RT(min)	m/z	Adduct	Formula	VIP	p-Value
	Amino acids and derivatives
M1	L-Arginine	1.41	174.11	[M+H]+	C6H14N4O2	1.12	5.19×10-4
M2	L-Aspartic acid	1.48	133.04	[M+H]+	C4H7NO4	1.18	1.57×10-3
M3	O-Succinyl-L-homoserine	1.6	219.07	[M+H-H2O]+	C8H13NO6	1	4.00×10-3
M4	L-Lysine	2.44	146.11	[M+H-H2O]+	C6H14N2O2	2.22	6.81×10-3
M5	N-Alpha-acetyllysine	1.73	188.12	[M+H-H2O]+	C8H16N2O3	1.97	1.12×10-2
M6	N6-Acetyl-L-lysine	2.85	188.12	[M+H-H2O]+	C8H16N2O3	3.63	4.92×10-2
	Acids
M7	2-Oxo-4-phenylbutyric acid	9.89	178.06	[M+H]+	C10H10O3	2.29	5.05×10-3
M8	Fumaric acid	8.83	116.01	[M]+	C4H4O4	2.11	5.95×10-3
M9	(+)-7-Isojasmonic acid	11.41	210.13	[M+H]+	C12H18O3	1.04	1.02×10-2
M10	Tropic acid	8.41	166.06	[M+H]+	C9H10O3	1.86	2.48×10-2
M11	Glyceric acid	1.41	106.03	[M-H]-	C3H6O4	1.2	3.38×10-3
M12	Syringic acid	8.99	198.05	[M-H]-	C9H10O5	2.8	1.91×10-2
M13	Gluconic acid	1.4	196.06	[M-H]-	C6H12O7	1.87	9.98×10-4
	Flavonoids
M14	Silibinin	9.55	482.12	[M+H]+	C25H22O10	1.42	2.87×10-3
M15	Vitexin	9.93	432.11	[M+H-H2O]+	C21H20O10	3.52	3.37×10-3
M16	Rutin	10.02	610.15	[M-H]-	C27H30O16	2.17	4.03×10-2
	Terpenoids
M17	Caryophyllene epoxide	11.13	220.18	[M+H-H2O]+	C15H24O	1.61	9.05×10-3
M18	Zerumbone	11.92	218.17	[M+H]+	C15H22O	1.19	9.16×10-3
M19	Perillyl alcohol	11.87	152.12	[M+H]+	C10H16O	1.13	1.78×10-2
	Nucleotide acids
M20	Guanine	1.7	151.05	[M+H]+	C5H5N5O	3.54	1.10×10-5
M21	N-D-Ribosylpurine	8.83	252.09	[M]+	C10H12N4O4	1.15	9.39×10-5
M22	Cytosine	1.53	111.04	[M+H]+	C4H5N3O	4	1.31×10-4
	Alkaloids
M23	1,3,7-Trimethyluric acid	6.71	210.08	[M+H]+	C8H10N4O3	1.46	2.63×10-4
M24	Dihydrocapsaicin	10.35	307.21	[M+H]+	C18H29NO3	1.12	7.90×10-3
