# Supplementary material for: Non-Targeted Metabolomics Analysis Revealed the Characteristic Non-Volatile and Volatile Metabolites in the Rougui Wuyi Rock Tea (Camellia sinensis) from Different Culturing Regions
Source: Foods. 2022 Jun 9;11(12):1694. doi: 10.3390/foods11121694 (PMC9222269; doi:10.3390/foods11121694)
Supplement: Supplementary file 1 [file foods-11-01694-s001.zip › Table S3.xlsx]

## Sheet: 英文
NO.	compounds	Odour description	Concentration (μg/kg dry weight of tea leaves)
			RG	HGRG	GPRG
	Alcohols
1	1-Penten-3-ol	Fruity, vegetable-like	339.28±23.80c	604.42±2.63b	797.70±7.64a
2	trans-2-pentenol	Mushroom-like	n.d.	73.59±5.30a	n.d.
3	trans-3-Hexenol	-	38.12±0.41b	39.23±6.81b	52.78±3.42a
4	1-Hexanol	Yeast aroma, Green, cut grass	36.61±0.62a	24.62±2.67c	31.07±0.78b
5	1-octen-3-ol	Waxy, fatty and citrus-, mushroom-like	n.d.	n.d.	6.88±0.18a
6	cis-α-α-5-trimethyl-5-vinyltetrahydrofuran-2-methanol	-	87.60±6.69c	124.43±14.90b	630.06±10.13a
7	Linalool	Floral, fruity	29.14±6.58c	88.61±8.97a	74.41±3.77b
8	Dehydrolinalool	Floral, fruity	35.52±0.01c	155.25±19.69b	1038.99±6.62a
9	2-nonen-1-ol	-	191.20±0.73a	23.08±4.15c	67.72±2.87b
	Aldehydes
10	3-Methylbutyraldehyde	Peach Fatty	n.d.	235.45±8.81b	391.44±13.68a
11	2-Methylbutyraldehyde	Grassy green	336.00±22.07c	1327.27±6.16a	1283.00±14.12b
12	Pentanal	Fruity, roast	1407.76±7.63a	n.d.	n.d.
13	2-Methyl-2-butenal	Green, fruity	176.96±5.99a	193.08±13.66a	187.85±6.91a
14	3-Methyl-2-butenal	Sweet, fruity, nutty	43.10±3.23c	89.89±4.40b	292.02±12.72a
15	Adipaldehyde	Green, fruit	124.50±2.45b	128.49±6.83b	172.56±9.21a
16	Furfural	Bread-like, roast	62.34±1.03b	31.08±8.60c	91.36±6.66a
17	cis-4-heptenal	Vegetable-like, roasted	10.40±0.08b	7.76±2.24c	23.48±0.22a
18	heptanal	Fruity, green	10.50±0.03c	12.70±0.91b	24.24±0.56a
19	Benzaldehyde	Sweet, fruity	95.52±4.85b	83.75±13.74b	134.30±2.10a
20	(E,E)-2,4-heptadienal	Green, fruity	8.49±0.02b	6.58±0.48c	37.70±0.12a
21	Phenylacetaldehyde	Grassy green, floral	256.70±1.70a	7.31±1.43c	23.28±0.57b
22	Saffron aldehyde	Woody, saffron	n.d.	10.27±1.39a	n.d.
23	β-Cyclocitral	Rose-like, herbal smell	27.55±0.73b	22.10±4.61b	39.59±1.40a
	Esters
24	Methyl Hexanoate	Pineapple-like	28.83±0.35a	22.76±1.26b	27.88±0.63a
25	Methyl (Z)-3-hexenoate	Fruity	56.09±0.91a	61.10±4.16a	58.76±0.07a
26	Methyl 2-hexenoate	Pineapple-like	32.17±0.58b	29.27±4.36b	68.37±3.48a
27	Methyl 2-furoate	Fruity, sweet	16.57±0.03a	6.32±0.34c	11.70±1.33b
28	Hexenyl 3-butyrate	-	9.08±0.13b	13.50±1.09a	14.47±0.39a
29	Methyl salicylate	Green, peppermint	n.d.	n.d.	23.39±0.80a
30	Hexyl butyrate	Apple-like	n.d.	20.18±4.64a	n.d.
31	Isovaleric acid leaf alcohol ester	Fruity	13.45±0.37c	20.92±4.68b	29.92±0.89a
32	Hexyl isovalerate	Fruity	22.20±0.25b	30.59±5.11a	34.88±1.12a
33	Linalyl acetate	Floral and fruity	n.d.	22.05±5.75a	n.d.
34	(Z)-Caproic acid 3-hexenyl ester	Green, fruity	63.51±0.99b	111.09±15.63a	96.56±3.04a
35	Hexanoic acid hexyl ester	Fruity	56.08±0.61b	94.83±12.14a	52.54±5.48b
36	Hexanoic acid trans-2-hexenyl ester	Herbal smell	14.60±1.44b	31.27±5.25a	13.73±0.97b
	Terpenes
37	2,6-Dimethylheptadiene-1,5-diene	-	42.73±0.28b	21.46±3.88c	68.46±8.33a
38	Camphene	Camphor-like	n.d.	n.d.	24.54±1.98a
39	2,6-dimethyl-2,6-octadiene	-	51.34±0.33c	80.66±11.15b	281.30±2.81a
40	3-carene	Citrus-like, woody	n.d.	55.48±3.59b	198.02±11.50a
41	2-carene	Grassy green	27.67±0.79b	37.42±6.66b	134.28±8.45a
42	alpha-pinene	Woody, herbal smell	29.39±0.76b	26.30±3.34b	130.95±5.89a
43	D-Limonene	Citrus-like, herbal smell	158.58±0.88c	245.85±7.03b	788.46±6.15a
44	trans-β-basilene	Grassy green, floral	n.d.	41.69±8.16b	129.95±4.29a
45	β-Rhodulene	Grassy green, floral	18.75±0.13c	204.54±13.09b	362.54±6.32a
46	gamma-pinene	Woody, herbal smell	46.23±2.41b	36.49±4.66b	116.47±8.52a
47	Terpinolene	Citrus-like, woody	27.67±0.98c	44.79±6.34b	154.35±5.43a
48	β-Scaberene	Spicy, woody	24.39±0.06b	44.54±6.19a	41.20±2.03a
49	α-Curcumene	-	8.82±0.05b	69.80±7.36a	12.81±0.16b
50	(Z, E) -α-Farnesene	-	n.d.	8.05±1.30a	n.d.
51	α-Farnesene	Citrus-like, herbal smell	26.43±0.21b	43.75±6.00a	19.44±1.35b
52	β-Red myrcene	-	15.11±0.89c	27.86±2.05a	21.70±0.64b
53	δ-Thujene	Woody	n.d.	n.d.	4.60±0.09a
54	β-Guaiacolene	-	51.41±1.30c	129.05±14.94a	71.32±4.77b
55	Boswellin terpene	-	n.d.	n.d.	111.53±2.82a
56	β-Pinene		162.02±0.51c	253.34±12.31b	599.07±1.43a
	Aromatic compounds
57	Toluene	Sweet	501.97±22.76b	288.26±12.29c	558.10±10.72a
58	p-Xylene	-	505.72±28.42a	190.99±8.32c	421.49±6.48b
59	1-Methyl-2-isopropylbenzene	-	63.31±2.03b	64.15±10.36b	322.71±11.59a
60	1-methyl-4-(1-methylethenyl)benzene	Spicy, clove-like	23.79±0.13b	26.58±4.61b	74.00±7.91a
61	1,2,3,4-tetramethylbenzene	-	n.d.	3.45±0.52b	11.43±0.08a
62	1,1,6-trimethyl-1,2-dihydronaphthalene	Licorice-like	36.51±2.18b	28.24±4.65b	49.50±7.09a
63	1,4,5-Trimethylnaphthalene	-	12.71±0.33b	24.33±3.54a	8.79±0.55b
	Alkanes
64	Dodecane	-	n.d.	12.86±3.90b	18.74±0.14a
65	Tetradecane	Fruity	11.00±1.21b	21.35±11.24ab	27.01±1.81a
66	Pentadecane	-	n.d.	124.09±1.51a	n.d.
67	Hexadecane	Orchid-like	n.d.	239.16±7.11a	31.08±1.39b
68	Heptadecane	-	n.d.	141.14±6.32a	32.31±0.35a
69	Octadecane	-	n.d.	24.02±11.39a	16.41±0.25a
70	Nineteen	-	n.d.	17.93±0.17a	n.d.
	Ketones
71	2-Methyl-3-pentanone	Peppermint-like	217.71±5.83b	199.01±11.50c	691.57±5.71a
72	2-Heptanone	Fruity and sweet	77.83±2.87b	69.91±5.95b	143.27±0.69a
73	6-Methyl-5-hepten-2-one	Fruity, lemon-like	114.74±0.43b	120.71±9.16b	254.84±4.53a
74	2,2,6-trimethylcyclohexanone	Spicy, sweet citrus	22.08±0.40b	27.31±3.01b	47.41±3.88a
75	α-Pyrrolone	Sweet, fruity	n.d.	5.28±0.38a	3.25±0.19b
	Heterocyclic compounds
76	2-Ethylfuran	Caramel-like	217.46±4.88b	372.35±13.95a	375.61±15.27a
77	2-Acetylfuran	Sweet, roasted	13.78±0.44a	10.69±2.55b	15.60±0.40a
78	N-Ethylpyrrole	Roasted	397.14±12.58c	647.99±16.94b	775.20±6.67a
79	2,3,5-Trimethyl-1H-pyrrole	-	21.59±0.39b	44.77±6.31a	41.86±0.08a
80	4-Ethyl-2-methyl-1H-pyrrole	-	9.05±0.80b	21.30±5.93a	17.69±0.58a
81	1-Furanyl pyrrole	Fruity	46.57±0.18b	33.76±7.98c	116.18±5.05a
82	2-Methylpyrazine	Nutty, roasted	38.96±1.95ab	28.47±8.74b	50.45±6.94a
83	2-Ethyl pyrazine	Nutty, roasted	15.02±0.58b	19.63±0.15a	13.19±0.72c
84	2-Ethyl-6-methylpyrazine	Roasted potato	186.97±240.61a	n.d.	n.d.
	Others
85	Decamethylcyclopentasiloxane	-	n.d.	n.d.	222.11±5.86a
86	Dodecamethylcyclohexasiloxane	-	22.47±0.14b	132.79±8.68b	251.62±4.28a
87	Tetradecamethylcycloheptasiloxane	-	n.d.	n.d.	94.07±3.44a
88	Hexadecamethylcyclooctasiloxane	-	201.11±4.52a	25.68±4.33c	39.50±0.54b
89	Isopentanenitrile	-	44.11±4.07c	80.47±18.68b	132.11±6.35a
90	Benzeneacetonitrile	-	180.86±0.43a	155.06±9.97b	72.15±1.50c
