# Supplementary material for: Non-Targeted Metabolomics Analysis Revealed the Characteristic Non-Volatile and Volatile Metabolites in the Rougui Wuyi Rock Tea (Camellia sinensis) from Different Culturing Regions
Source: Foods. 2022 Jun 9;11(12):1694. doi: 10.3390/foods11121694 (PMC9222269; doi:10.3390/foods11121694)
Supplement: Supplementary file 1 [file foods-11-01694-s001.zip › Table S4.xlsx]

## Sheet: 英文
No.	Compounds	Odour description	Threshold(ug/kg)		OAV
				RG	HGRG	GPRG
C1	1-Penten-3-ol	Fruity, vegetable-like	400	0.85	1.51106	1.99426
C2	1-octen-3-ol	Waxy, fatty and citrus-, mushroom-like	1.5	n.d.	n.d.	4.58337
C3	Linalool	Floral, fruity	1.5	19.4295	59.0738	49.6053
C4	Dehydrolinalool	Floral, fruity	110	0.32	1.41137	9.44535
C5	3-Methylbutyraldehyde	Peach Fatty	0.25	n.d.	941.809	1565.75
C6	2-Methylbutyraldehyde	Grassy green	0.8	420.006	1659.09	1603.75
C7	Pentanal	Fruity, roast	12	117.313	n.d.	n.d.
C8	Adipaldehyde	Green, fruit	4.5	27.6659	28.554	38.3464
C9	(Z)-4-heptenal	Vegetable-like, roasted	10	1.03985	0.78	2.3477
C10	Phenylacetaldehyde	Grassy green, floral	4	64.1753	1.82723	5.81962
C11	Saffron aldehyde	Woody, saffron	0.7	n.d.	14.674	n.d.
C12	β-Cyclocitral	Rose-like, herbal smell	3	9.18274	7.36517	13.1966
C13	(Z)-Caproic acid 3-hexenyl ester	Green, fruity	16	3.9694	6.94336	6.03501
C14	Hexanoic acid hexyl ester	Fruity	40	1.402	2.37067	1.31353
C15	3-carene	Citrus-like, woody	44	n.d.	1.26	4.5
C16	2-carene	Grassy green	37	0.75	1.01148	3.62906
C17	alpha-pinene	Woody, herbal smell	85	0.35	0.31	1.54
C18	D-Limonene	Citrus-like, herbal smell	10	15.858	24.5851	78.8457
C19	(E)-β-basilene	Grassy green, floral	60	0.31	3.40896	6.04237
C20	β-Rhodulene	Grassy green, floral	60	n.d.	0.69	2.16575
C21	α-Farnesene	Citrus-like, herbal smell	10	2.64	4.36	1.94
C22	β-Pinene	Woody	140	1.16	1.81	4.28
C23	Toluene	Sweet	140	3.58553	2.05899	3.98646
C24	6-Methyl-5-hepten-2-one	Fruity, lemon-like	100	1.14735	1.20709	2.54839
