# Supplementary material for: Non-Targeted Metabolomics Analysis Revealed the Characteristic Non-Volatile and Volatile Metabolites in the Rougui Wuyi Rock Tea (Camellia sinensis) from Different Culturing Regions
Source: Foods. 2022 Jun 9;11(12):1694. doi: 10.3390/foods11121694 (PMC9222269; doi:10.3390/foods11121694)
Supplement: Supplementary file 1 [file foods-11-01694-s001.zip › Table S5.xlsx]

## Sheet: 24 volatiles
Fruity	1-Penten-3-ol		Floral	1-Penten-3-ol
	Linalool			Linalool
	Dehydrolinalool			Dehydrolinalool
	Pentanal			Saffron aldehyde		Roast	Pentanal
	Adipaldehyde			β-Cyclocitral			(Z)-4-heptenal
	(Z)-Caproic acid 3-hexenyl ester			(E)-β-basilene
	Hexanoic acid hexyl ester			β-Rhodulene
	6-Methyl-5-hepten-2-one
Grassy green	2-Methylbutyraldehyde
	Phenylacetaldehyde		Woody	Saffron aldehyde		Herbal smell	β-Cyclocitral
	2-carene			3-carene			alpha-pinene
	(E)-β-basilene			alpha-pinene			D-Limonene
	β-Rhodulene			β-Pinene			α-Farnesene
Pungent	D-Limonene
	6-Methyl-5-hepten-2-one
	Dehydrolinalool

## Sheet: 16volatiles
Floral	1-Penten-3-ol		Fruity	1-Penten-3-ol
	Dehydrolinalool			Dehydrolinalool
	Saffron aldehyde			Adipaldehyde
	β-Cyclocitral			6-Methyl-5-hepten-2-one
	(E)-β-basilene
	β-Rhodulene
Roast	3-Methylbutyraldehyde		Woody	3-carene
	6-Methyl-5-hepten-2-one			2-carene
				alpha-pinene
Pungent	D-Limonene
	6-Methyl-5-hepten-2-one
	Dehydrolinalool
