# Supplementary figures and images for: Non-Targeted Metabolomics Analysis Revealed the Characteristic Non-Volatile and Volatile Metabolites in the Rougui Wuyi Rock Tea (Camellia sinensis) from Different Culturing Regions
Source: MDPI journal article supplement (doi:10.3390/foods11121694), 2022-06-09

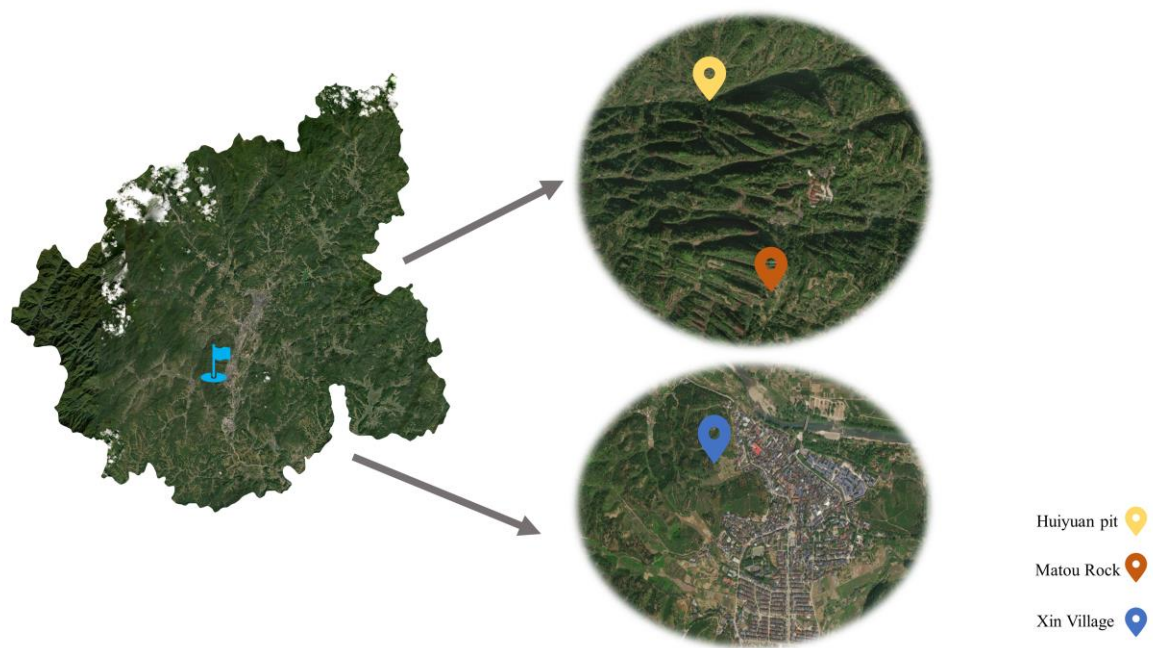

**Figure S1.** The schematic map of sample collection.

Supplement: s1 [file s1]
